# Supplementary material for: Cross coupling of sulfonyl radicals with silver-based carbenes: a simple approach to β-carbonyl arylsulfones
Source: Royal Society of Chemistry journal article supplement (doi:10.1039/d0ob00091d), 2020-01-01

## **SUPPORTING INFORMATION**

### **Cross Coupling of Sulfonyl Radical with Silver-Based Carbene: A Simple Approach to $\beta$ -Carbonyl Arylsulfones**

Hanghang Wang, Pengcheng Lian, Yonggao Zheng, Jingjing Li, Xiaobing Wan\*

*Key Laboratory of Organic Synthesis of Jiangsu Province, College of Chemistry, Chemical Engineering and*

*Materials Science, Soochow University, Suzhou 215123, P. R. China*

Email: [wanxb@suda.edu.cn](mailto:wanxb@suda.edu.cn)

#### **List of Contents**

|                                                                          |           |
|--------------------------------------------------------------------------|-----------|
| <b>General procedures for the preparation of starting materials.....</b> | <b>S2</b> |
| <b>Optimization of the Reaction Conditions .....</b>                     | <b>S3</b> |
| <b>Mechanistic studies.....</b>                                          | <b>S4</b> |
| <b>Spectroscopic data for products.....</b>                              | <b>S8</b> |

## General procedures for the preparation of starting materials

### (a) The procedure for the synthesis of diazo compounds<sup>1</sup>

The corresponding alcohol or dibenzylamine (20 mmol) and NaHCO<sub>3</sub> (5.0 g, 60 mmol) were dissolved in acetonitrile (50 mL) and bromoacetyl bromide (2.6 mL, 30 mmol) was added slowly at 0 °C. After stirring 30 min at the temperature, the reaction was quenched with H<sub>2</sub>O. The solution was extracted with CH<sub>2</sub>Cl<sub>2</sub> three times. The organic phase was washed with brine and dried over Na<sub>2</sub>SO<sub>4</sub>. The solvent was evaporated, and the residue was used in the next reaction without purification. The bromoacetate thus obtained and *N, N'*-ditosylhydrazine (13.6 g, 40 mmol) were dissolved in THF (50 mL) and cooled to 0 °C. DBU (6.0 mL, 40 mmol) was added dropwise and stirred at the temperature for 30 minutes. After the quenching of the reaction by the addition of saturated NaHCO<sub>3</sub> solution, it was extracted with Et<sub>2</sub>O three times. The organic phase was washed with brine, dried over Na<sub>2</sub>SO<sub>4</sub> and evaporated to give the crude product. The crude product thus obtained was purified by chromatography over a column of silica gel using petroleum and ethyl acetate as eluent to afford the desired product.

### (b) The procedure for the synthesis of diazo compounds **2m** and **2n**<sup>2</sup>

To a stirred solution of methyl ethyl 2-methyl-3-oxobutanoate or ethyl 2-ethyl-3-oxobutanoate (10.0 mmol, 1.00 equiv) and *p*-acetamidobenzenesulfonyl azide (15.0 mmol, 1.50 equiv) in dry CH<sub>3</sub>CN (20 mL) was added DBU (4.6 mL, 30 mmol, 3.0 equiv) at 0 °C. The reaction mixture was then allowed to warm to room temperature. After stirring for 12 h, the resulting mixture was quenched with 20 mL of 1 M HCl, and extracted with hexane (3 x 50 mL). The combined organic layers were washed with saturated solution of NaHCO<sub>3</sub> (50 mL), brine (50 mL), and dried over anhydrous MgSO<sub>4</sub>. The solvent was removed under reduced pressure and purified by flash column chromatography using 1:20 ethyl acetate: petroleum as eluent to afford the corresponding diazo compounds **2m** or **2n** as a yellow oil.

### (c) The procedure for the synthesis of sodium arylsulfonates<sup>3</sup>

Sodium sulfite (20 mmol, 2 equiv), sodium bicarbonate (20 mmol, 2 equiv) and the corresponding aryl sulfonyl chloride (10 mmol, 1 equiv.) were dissolved in distilled water (10 mL). The reaction mixture was stirred for 4 h at 80 °C. After cooling down to room temperature, water was removed in vacuo. 25 mL of ethanol was then added to this white residue and the resulting heterogeneous solution was filtered. The filtrate was concentrated under reduced pressure and the desired sodium aryl sulfonates were obtained as white crystalline powders.

Sodium arylsulfonates **1a**, **1b**, **1e** and **1f** are commercially available.

**Table S1. Optimization of the Reaction Conditions<sup>a</sup>**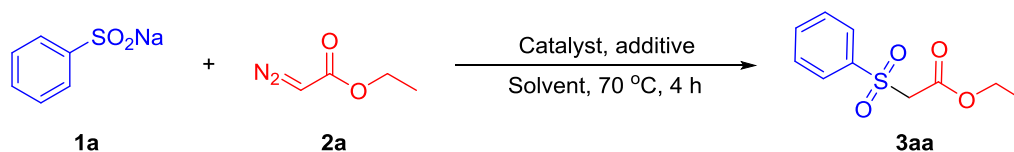

| Entry | Catalyst (mol%)                         | Additive (equiv.)                                                   | Solvent                           | Ligand (mol%) | Yield [%] <sup>b</sup> |
|-------|-----------------------------------------|---------------------------------------------------------------------|-----------------------------------|---------------|------------------------|
| 1     | AgNO <sub>3</sub> (20)                  | K <sub>2</sub> S <sub>2</sub> O <sub>8</sub> (2.0)                  | DCE                               | —             | n.d.                   |
| 2     | AgNO <sub>3</sub> (20)                  | K <sub>2</sub> S <sub>2</sub> O <sub>8</sub> (2.0)                  | EtOH                              | —             | n.d.                   |
| 3     | AgNO <sub>3</sub> (20)                  | K <sub>2</sub> S <sub>2</sub> O <sub>8</sub> (2.0)                  | 1,4-dioxane                       | —             | n.d.                   |
| 4     | AgNO <sub>3</sub> (20)                  | K <sub>2</sub> S <sub>2</sub> O <sub>8</sub> (2.0)                  | MeCN                              | —             | trace                  |
| 5     | AgNO <sub>3</sub> (20)                  | K <sub>2</sub> S <sub>2</sub> O <sub>8</sub> (2.0)                  | DMF                               | —             | n.d.                   |
| 6     | AgNO <sub>3</sub> (20)                  | K <sub>2</sub> S <sub>2</sub> O <sub>8</sub> (2.0)                  | H <sub>2</sub> O                  | —             | n.d.                   |
| 7     | AgNO <sub>3</sub> (20)                  | K <sub>2</sub> S <sub>2</sub> O <sub>8</sub> (2.0)                  | MeCN/H <sub>2</sub> O (1:1)       | —             | 36                     |
| 8     | AgNO <sub>3</sub> (20)                  | K <sub>2</sub> S <sub>2</sub> O <sub>8</sub> (2.0)                  | MeCN/H <sub>2</sub> O (5:1)       | —             | 43                     |
| 9     | AgNO <sub>3</sub> (20)                  | K <sub>2</sub> S <sub>2</sub> O <sub>8</sub> (2.0)                  | MeCN/H <sub>2</sub> O (7:1)       | —             | 46                     |
| 10    | AgNO <sub>3</sub> (20)                  | K <sub>2</sub> S <sub>2</sub> O <sub>8</sub> (2.0)                  | MeCN/H <sub>2</sub> O (10:1)      | —             | 54                     |
| 11    | AgNO <sub>3</sub> (20)                  | K <sub>2</sub> S <sub>2</sub> O <sub>8</sub> (1.0)                  | MeCN/H <sub>2</sub> O (10:1)      | —             | 56                     |
| 12    | AgNO <sub>3</sub> (20)                  | K <sub>2</sub> S <sub>2</sub> O <sub>8</sub> (0.5)                  | MeCN/H <sub>2</sub> O (10:1)      | —             | 68                     |
| 13    | AgNO <sub>3</sub> (20)                  | K <sub>2</sub> S <sub>2</sub> O <sub>8</sub> (0.2)                  | MeCN/H <sub>2</sub> O (10:1)      | —             | 45                     |
| 14    | CF <sub>3</sub> CO <sub>2</sub> Ag (20) | K <sub>2</sub> S <sub>2</sub> O <sub>8</sub> (0.5)                  | MeCN/H <sub>2</sub> O (10:1)      | —             | 62                     |
| 15    | AgOAc (20)                              | K <sub>2</sub> S <sub>2</sub> O <sub>8</sub> (0.5)                  | MeCN/H <sub>2</sub> O (10:1)      | —             | 58                     |
| 16    | Ag <sub>2</sub> CO <sub>3</sub> (20)    | K <sub>2</sub> S <sub>2</sub> O <sub>8</sub> (0.5)                  | MeCN/H <sub>2</sub> O (10:1)      | —             | 63                     |
| 17    | AgF (20)                                | K <sub>2</sub> S <sub>2</sub> O <sub>8</sub> (0.5)                  | MeCN/H <sub>2</sub> O (10:1)      | —             | 59                     |
| 18    | AgNO <sub>3</sub> (20)                  | Na <sub>2</sub> S <sub>2</sub> O <sub>8</sub> (0.5)                 | MeCN/H <sub>2</sub> O (10:1)      | —             | 65                     |
| 19    | AgNO <sub>3</sub> (20)                  | (NH <sub>4</sub> ) <sub>2</sub> S <sub>2</sub> O <sub>8</sub> (0.5) | MeCN/H <sub>2</sub> O (10:1)      | —             | 48                     |
| 20    | AgNO <sub>3</sub> (20)                  | K <sub>2</sub> S <sub>2</sub> O <sub>8</sub> (0.5)                  | MeCN/H <sub>2</sub> O (10:1)      | <b>L1(20)</b> | 76                     |
| 21    | AgNO <sub>3</sub> (20)                  | K <sub>2</sub> S <sub>2</sub> O <sub>8</sub> (0.5)                  | MeCN/H <sub>2</sub> O (10:1)      | <b>L2(20)</b> | 73                     |
| 22    | AgNO <sub>3</sub> (20)                  | K <sub>2</sub> S <sub>2</sub> O <sub>8</sub> (0.5)                  | MeCN/H <sub>2</sub> O (10:1)      | <b>L3(20)</b> | 68                     |
| 23    | AgNO <sub>3</sub> (20)                  | K <sub>2</sub> S <sub>2</sub> O <sub>8</sub> (0.5)                  | MeCN/H <sub>2</sub> O (10:1)      | <b>L1(15)</b> | 77                     |
| 24    | AgNO <sub>3</sub> (20)                  | K <sub>2</sub> S <sub>2</sub> O <sub>8</sub> (0.5)                  | MeCN/H <sub>2</sub> O (10:1)      | <b>L1(10)</b> | 77                     |
| 25    | <b>AgNO<sub>3</sub> (10)</b>            | <b>K<sub>2</sub>S<sub>2</sub>O<sub>8</sub> (0.5)</b>                | <b>MeCN/H<sub>2</sub>O (10:1)</b> | <b>L1(10)</b> | <b>80</b>              |
| 26    | AgNO <sub>3</sub> (5)                   | K <sub>2</sub> S <sub>2</sub> O <sub>8</sub> (0.5)                  | MeCN/H <sub>2</sub> O (10:1)      | <b>L1(10)</b> | 72                     |
| 27    | AgNO <sub>3</sub> (10)                  | K <sub>2</sub> S <sub>2</sub> O <sub>8</sub> (0.5)                  | MeCN/H <sub>2</sub> O (10:1)      | <b>L4(10)</b> | 68                     |
| 28    | AgNO <sub>3</sub> (10)                  | K <sub>2</sub> S <sub>2</sub> O <sub>8</sub> (0.5)                  | MeCN/H <sub>2</sub> O (10:1)      | <b>L5(10)</b> | 70                     |
| 29    | AgNO <sub>3</sub> (10)                  | K <sub>2</sub> S <sub>2</sub> O <sub>8</sub> (0.5)                  | MeCN/H <sub>2</sub> O (10:1)      | <b>L6(10)</b> | 57                     |
| 30    | —                                       | K <sub>2</sub> S <sub>2</sub> O <sub>8</sub> (0.5)                  | MeCN/H <sub>2</sub> O (10:1)      | <b>L1(10)</b> | < 5                    |
| 31    | AgNO <sub>3</sub> (10)                  | —                                                                   | MeCN/H <sub>2</sub> O (10:1)      | <b>L1(10)</b> | < 5                    |

<sup>a</sup> Unless otherwise noted, all the reactions were run with **1a** (0.5 mmol) and **2a** (1 mmol) in 2.0 mL solvent at 70 °C under air. <sup>b</sup> isolated yields. n.d. = not detected. **L1** = 1,10-phenanthroline, **L2** = 2,2'-bipyridine, **L3** = 2,2':6',2''-terpyridine, **L4** = 4,7-dimethoxy-1,10-phenanthroline, **L5** = 4,7-diphenyl-1,10-phenanthroline, **L6** = 3,8-dibromo-1,10-phenanthroline.

## Mechanistic studies

### Scheme S1. Trapping of radical by 1,1-diphenylethylene

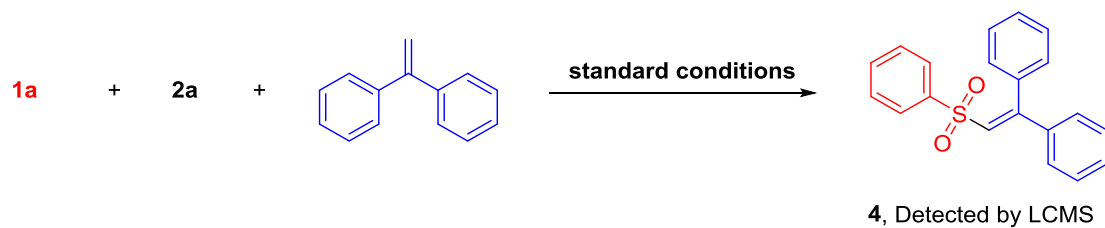

### Adduct Detected by LCMS

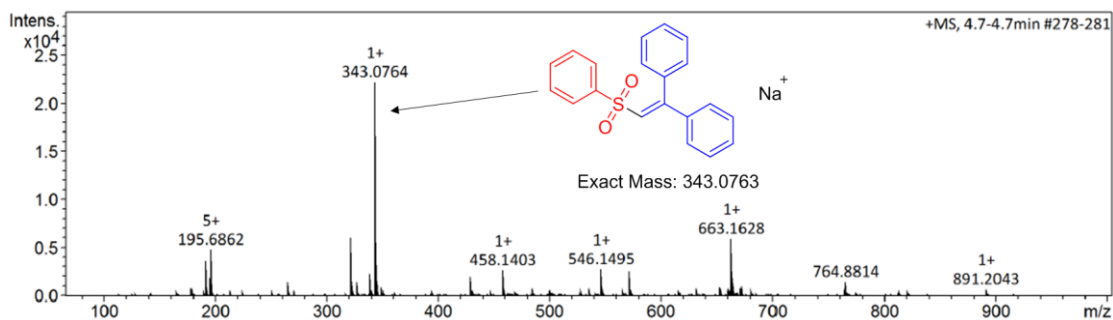

### Scheme S2. Trapping of silver-based carbene

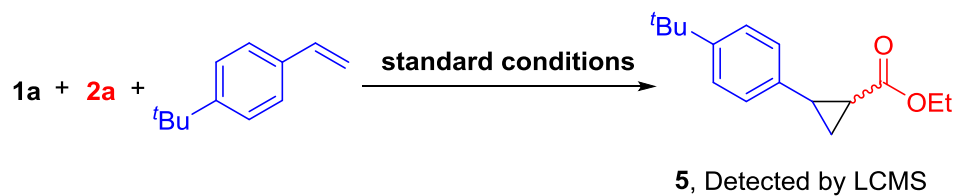

### Adduct 7 Detected by LCMS

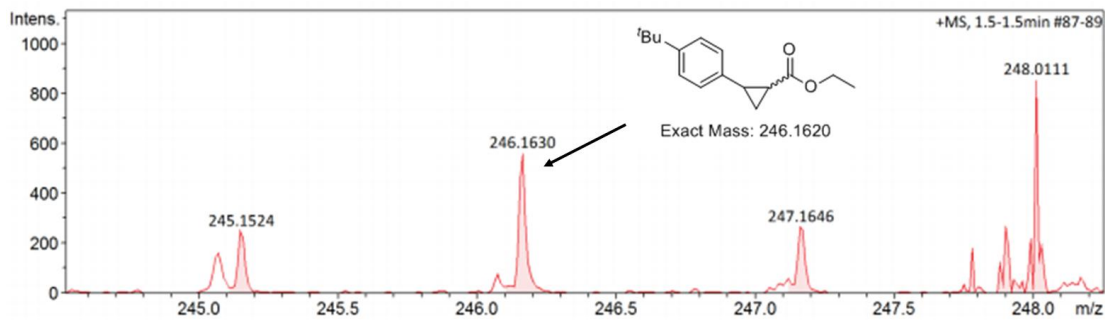

### Scheme S3. Trapping of radicals by BHT

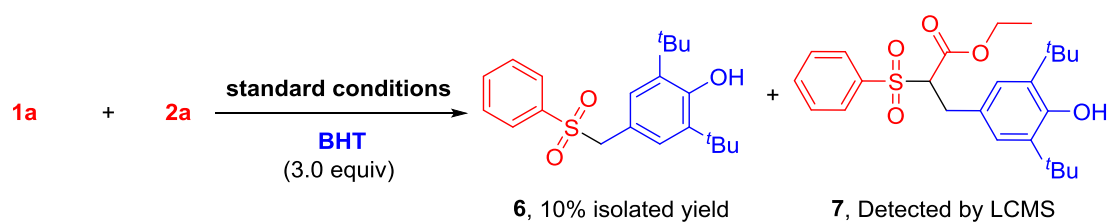

### Adduct Detected by LCMS

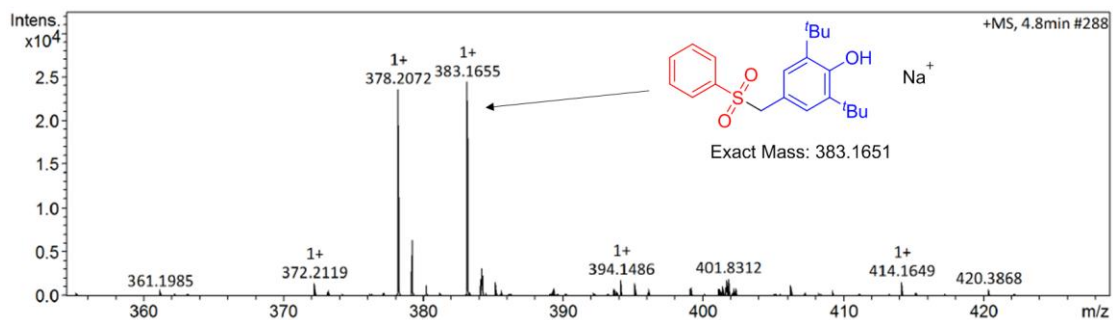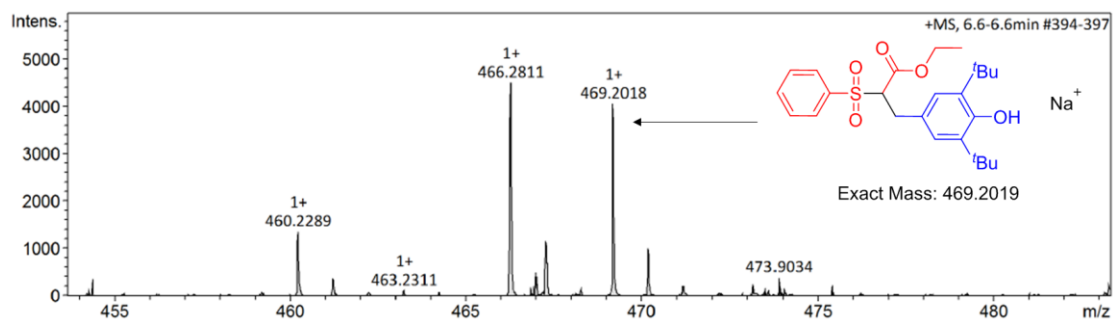

### NMR of 6

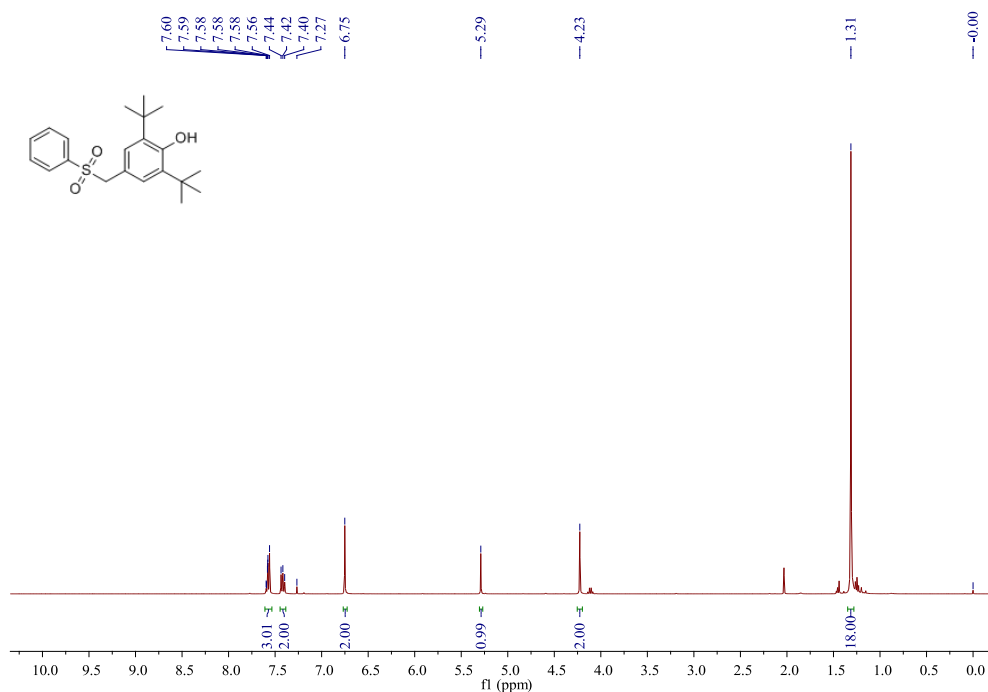

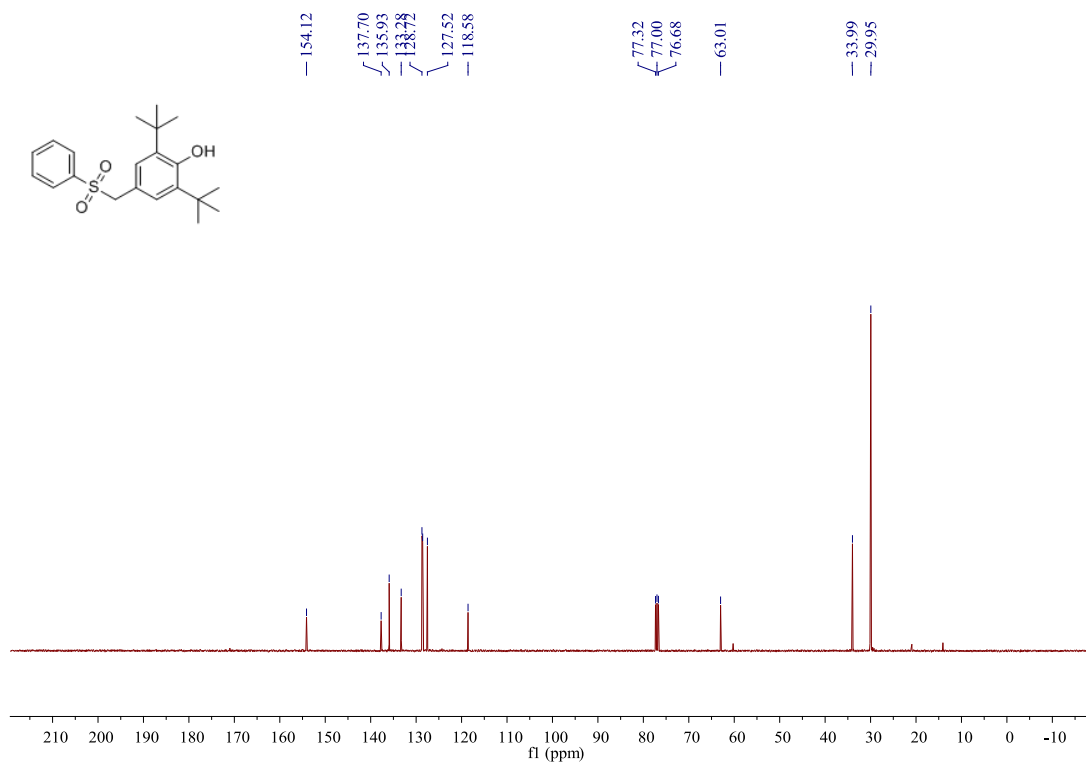

#### Scheme S4. Isotope labeling experiment

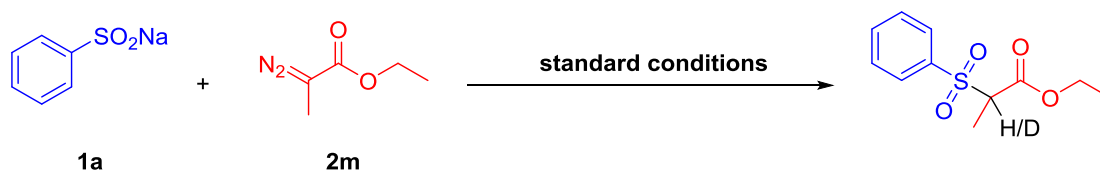

Reaction Medium  $\text{CH}_3\text{CN}/\text{D}_2\text{O} = 10:1$  (2 mL)

Reaction Medium  $\text{CD}_3\text{CN}/\text{H}_2\text{O} = 10:1$  (2 mL)

Product

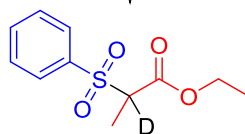

[D]-3am

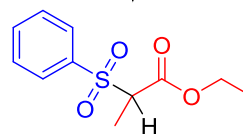

[H]-3am

Product detected by LCMS

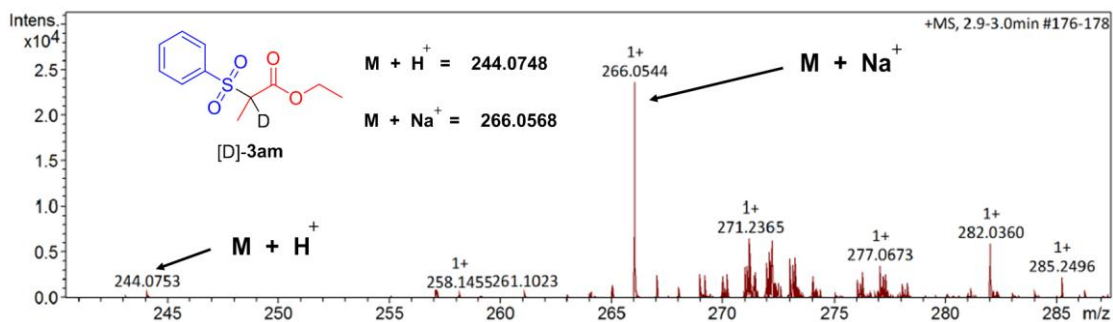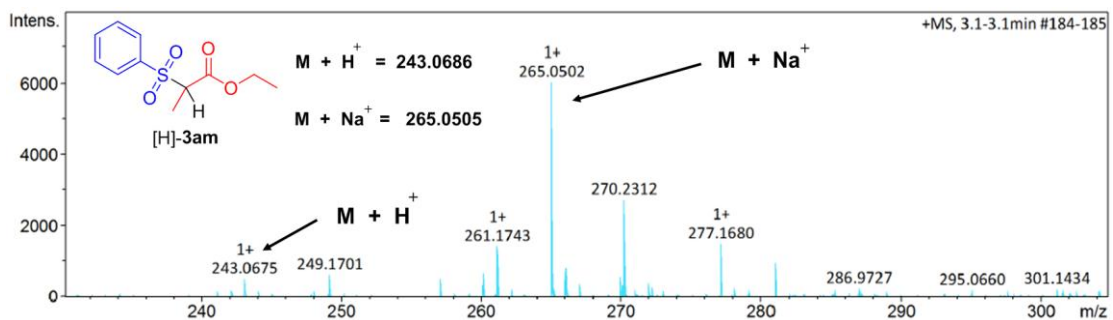

## References:

- (1) T. Toma, J. Shimokawa and T. Fukuyama, *Org. Lett.*, 2007, **9**, 3195.
- (2) T. Hashimoto, Y. Naganawa and K. Maruoka, *J. Am. Chem. Soc.*, 2011, **133**, 8834.
- (3) (a) A. U. Meyer, S. Jager, D. Prasad Hari and B. Konig, *Adv. Synth. Catal.*, 2015, **357**, 2050. (b) G. Bogonda, D. V. Patil, H. Y. Kim and K. Oh, *Org. Lett.*, 2019, **21**, 3774.

## Spectroscopic data for products

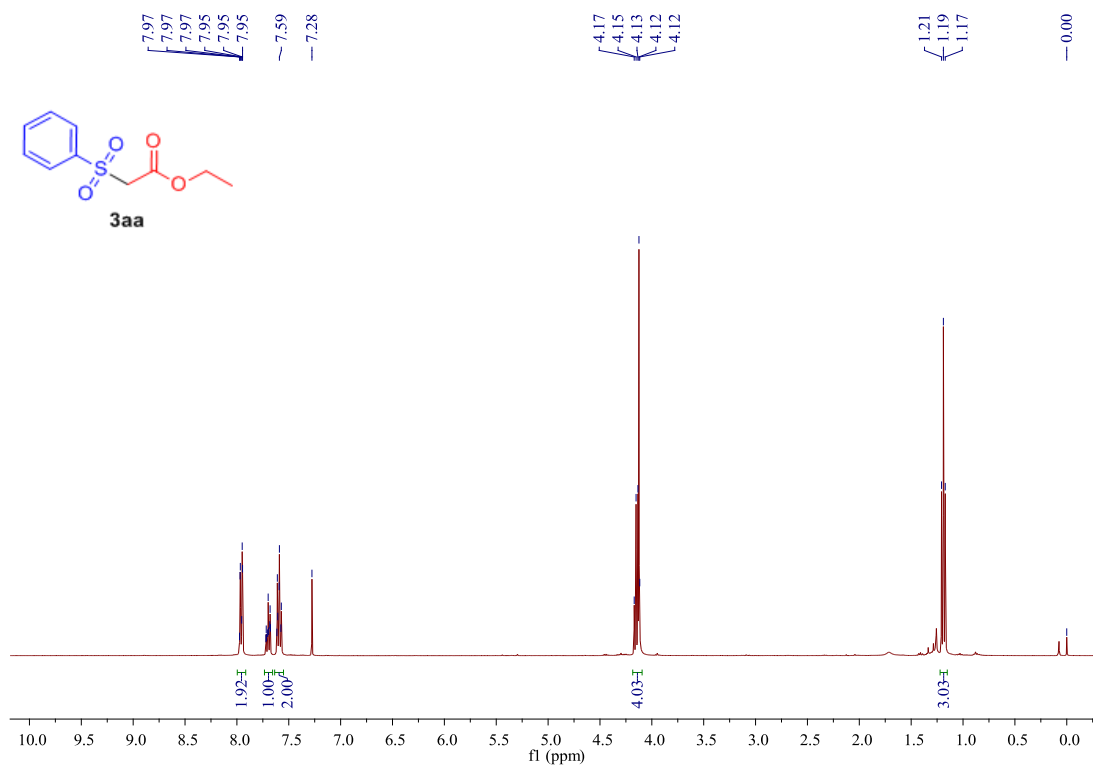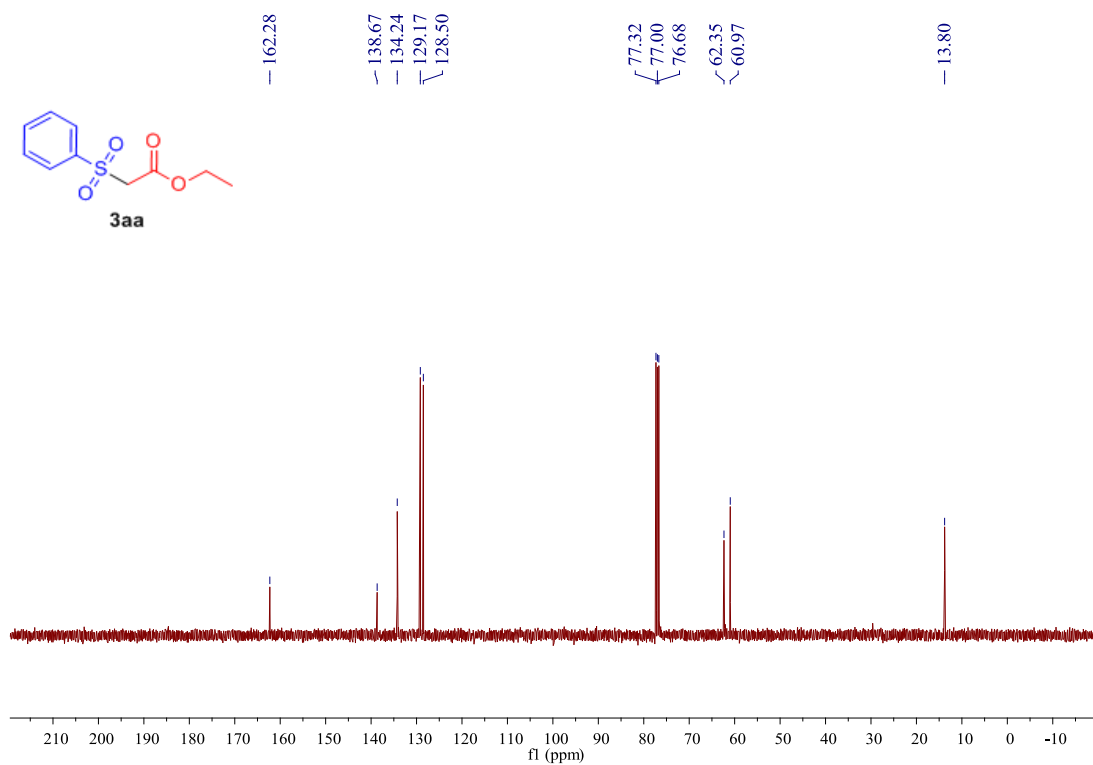



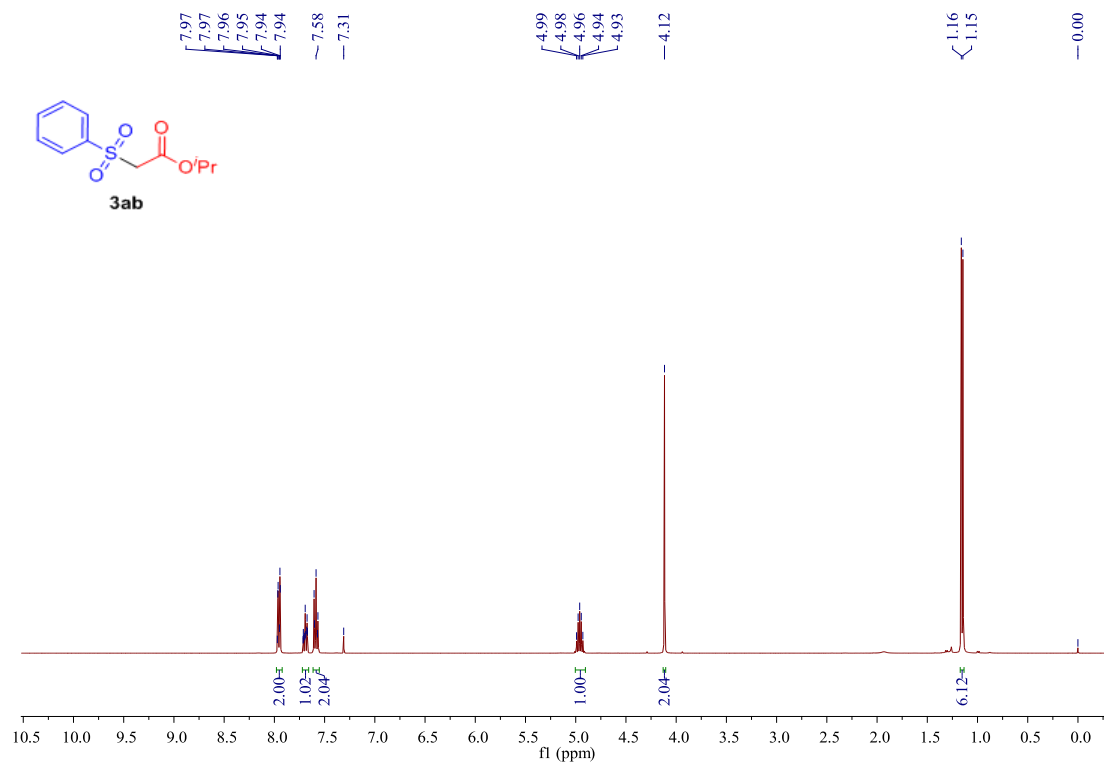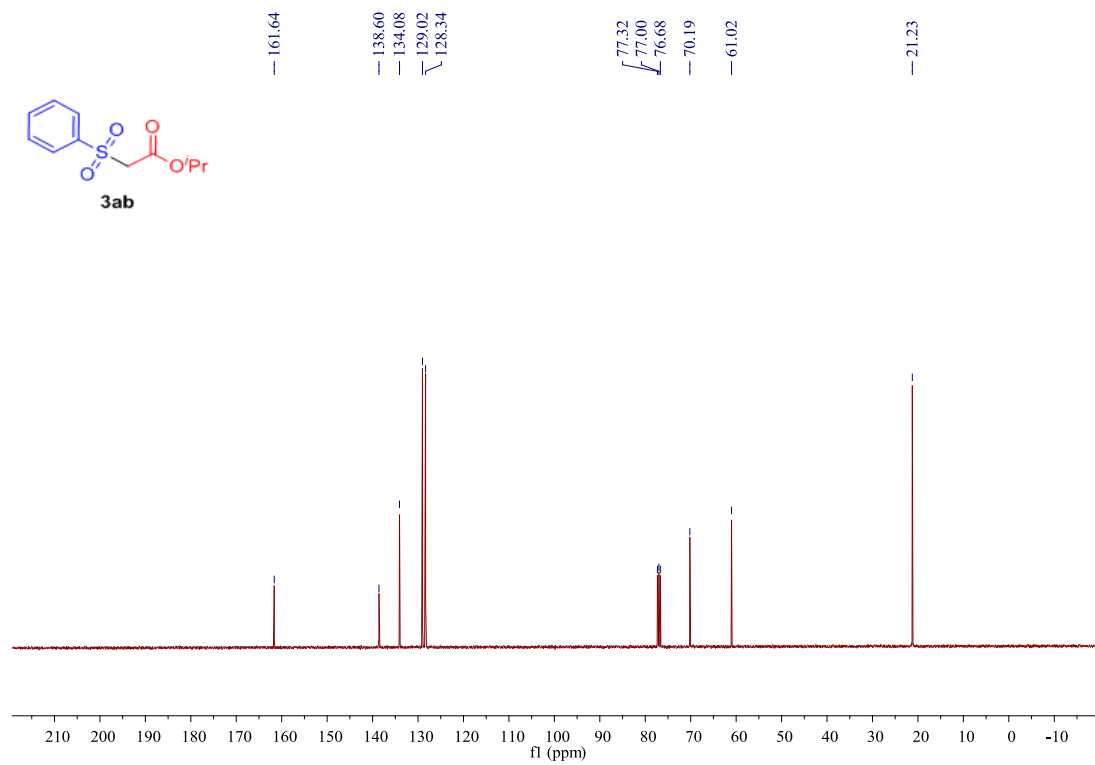

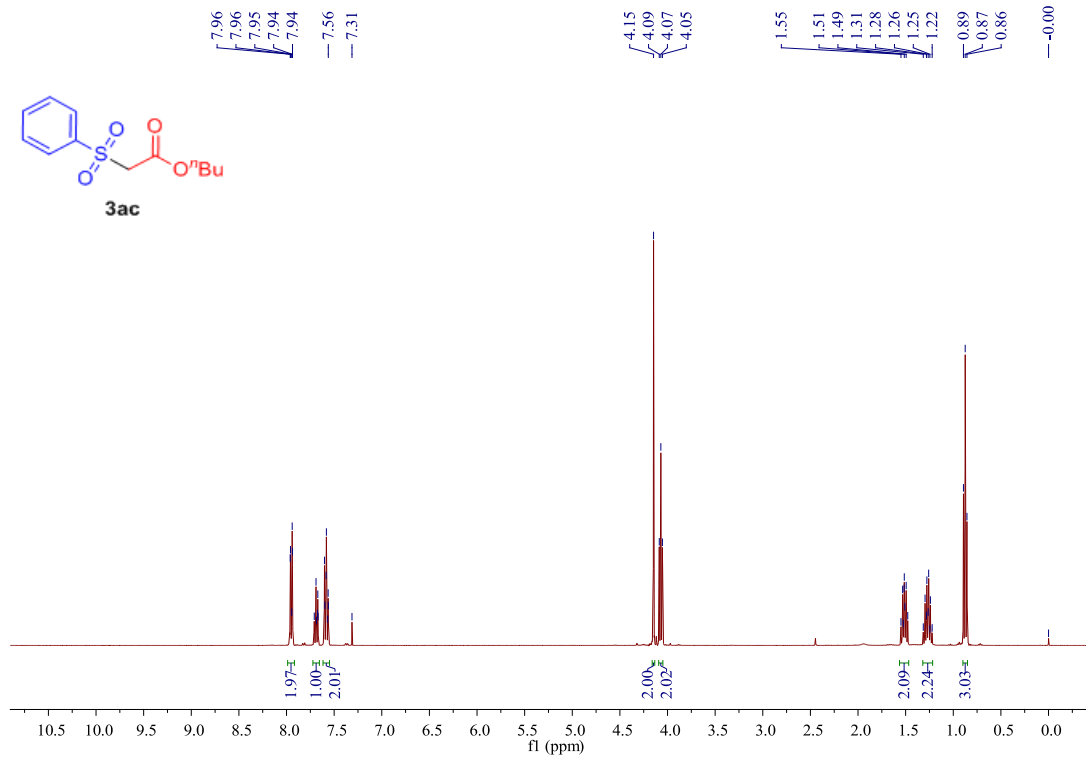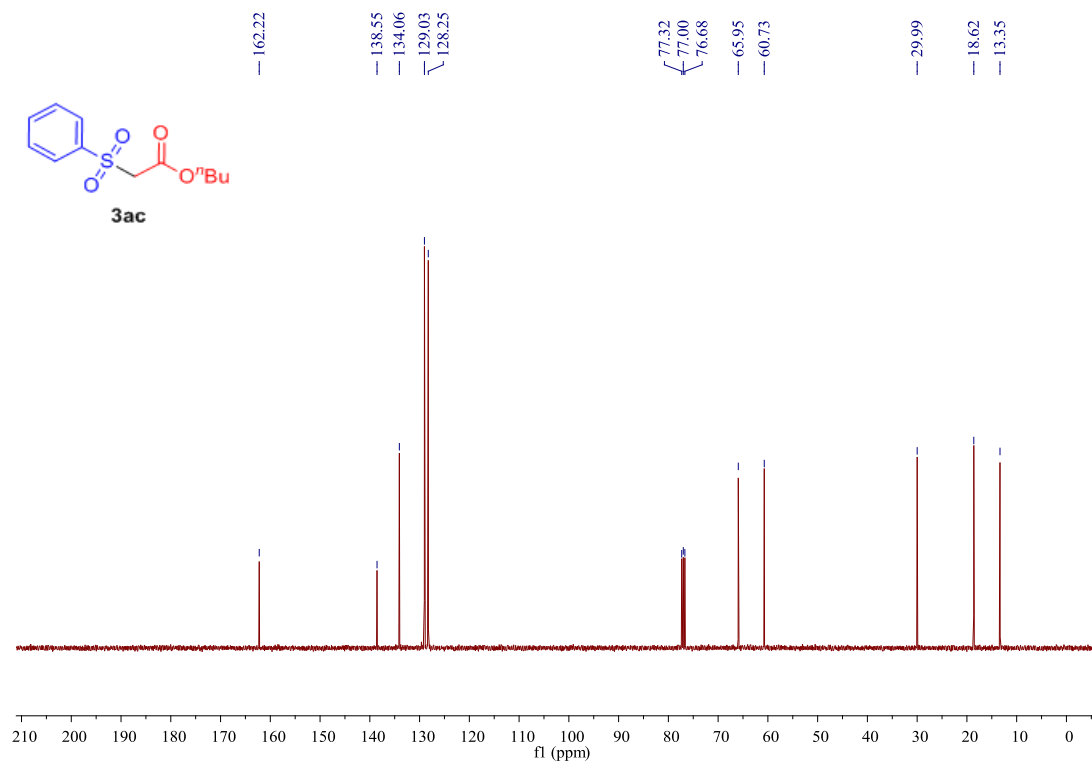

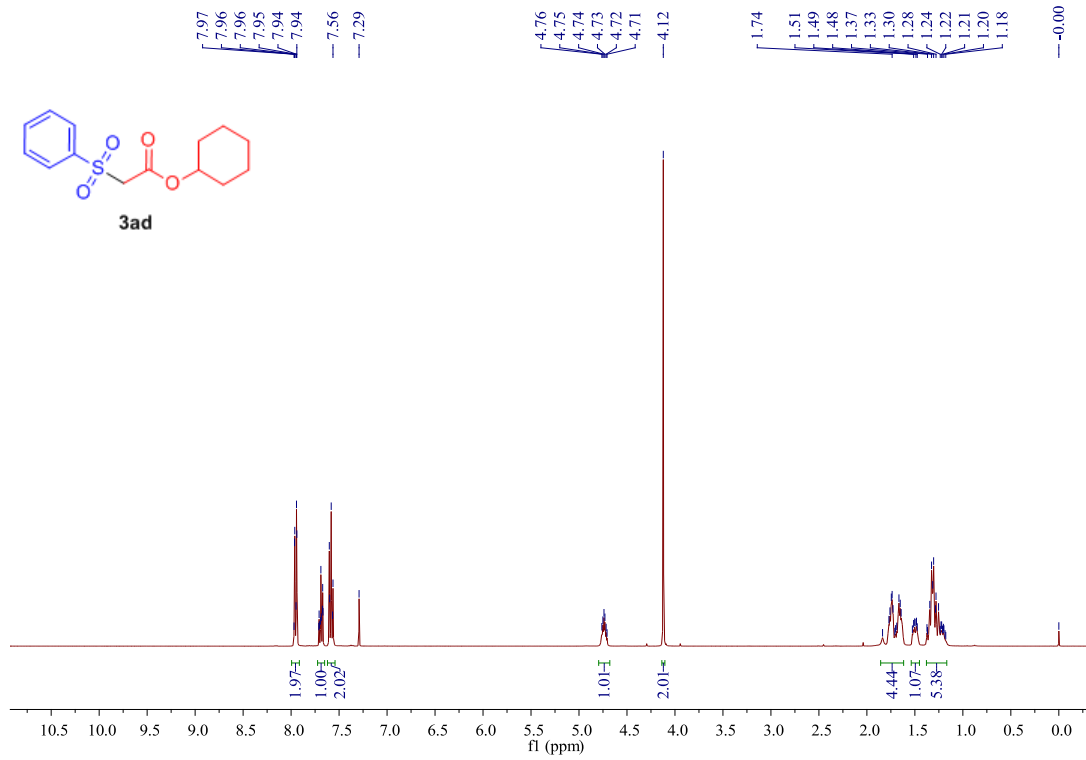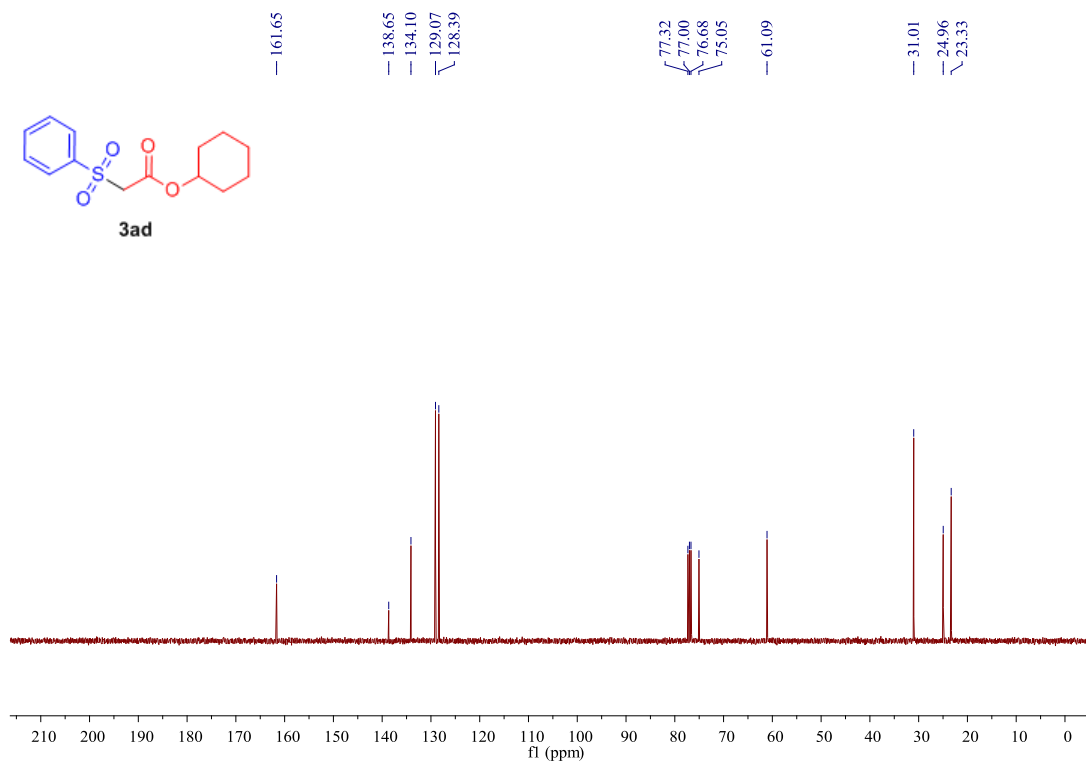

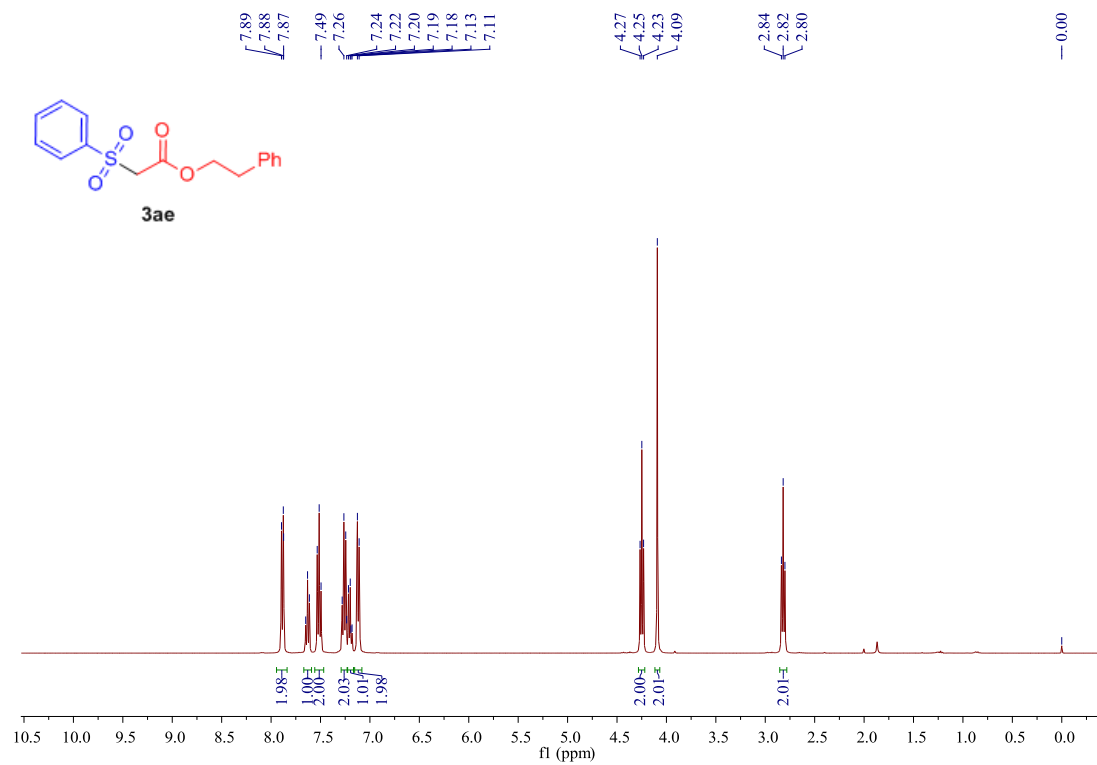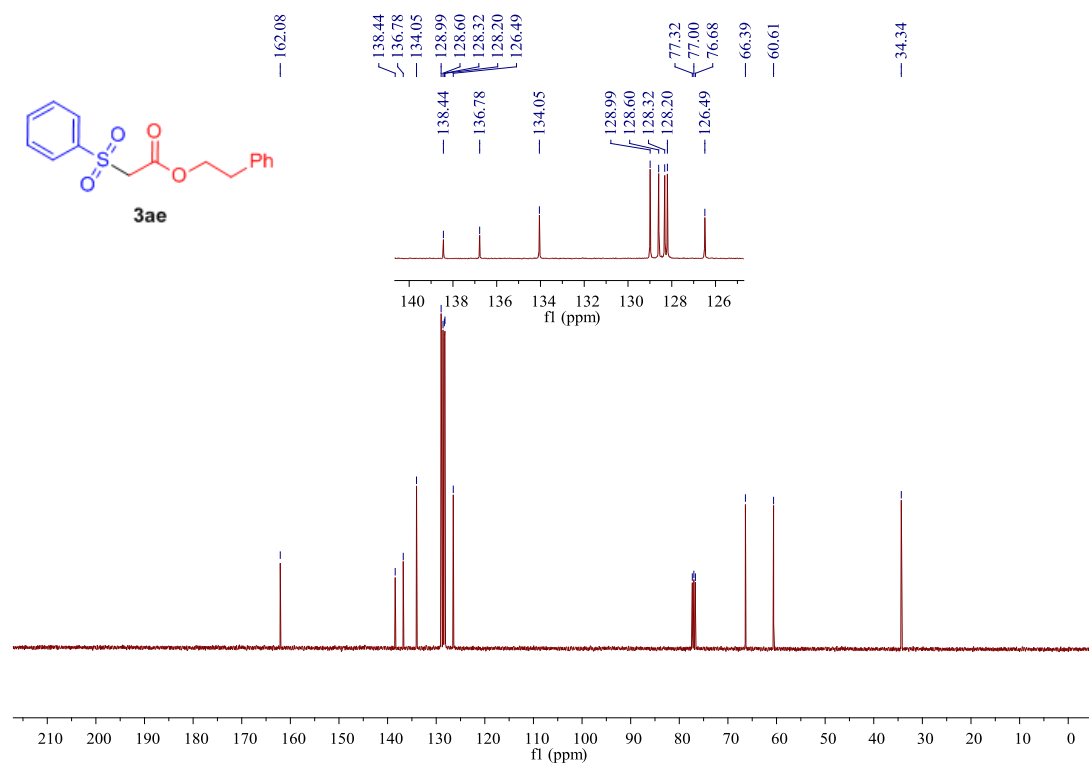

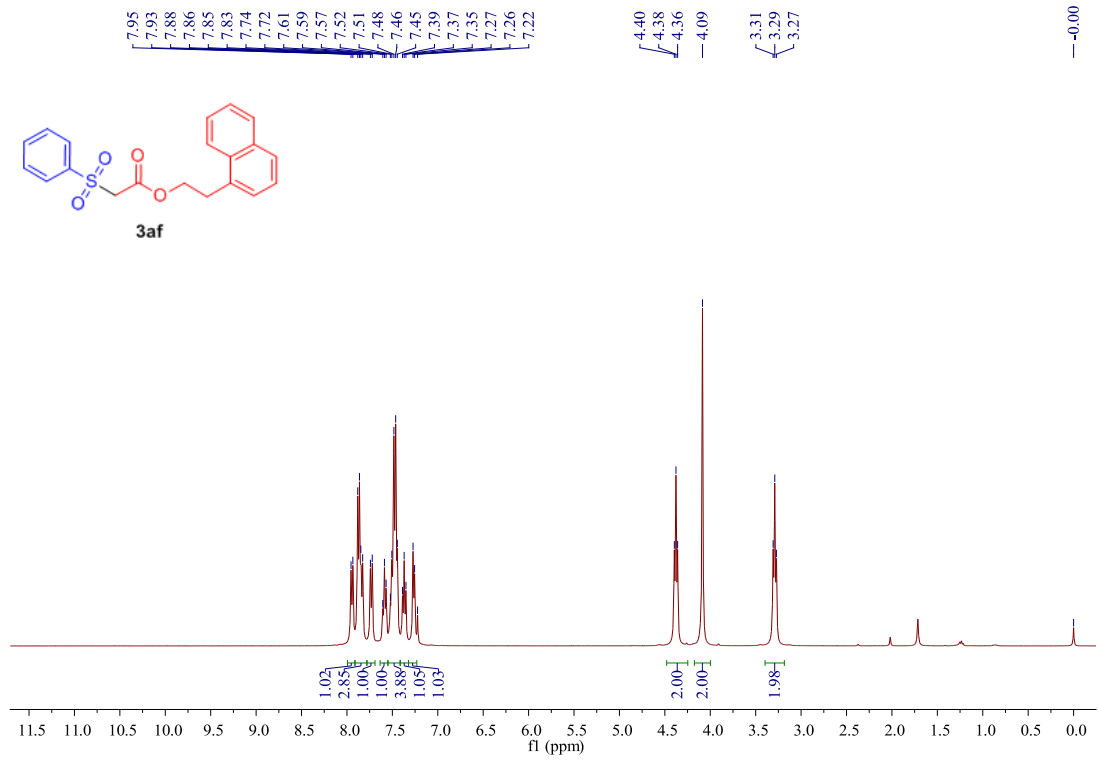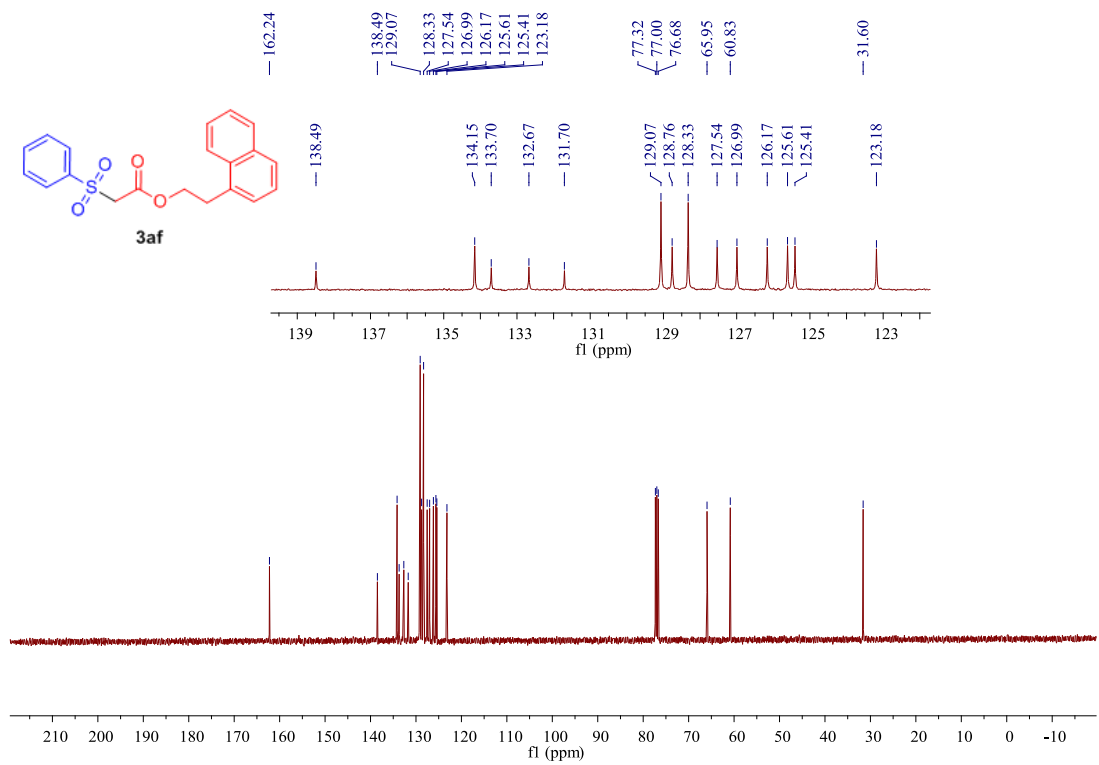

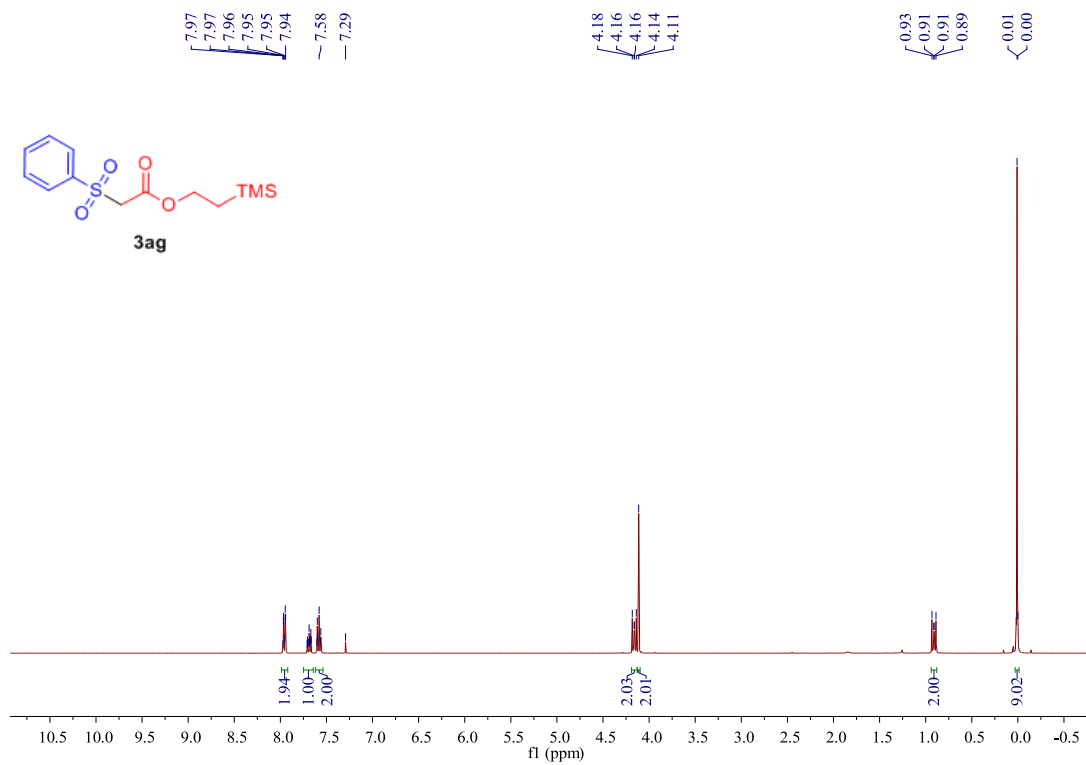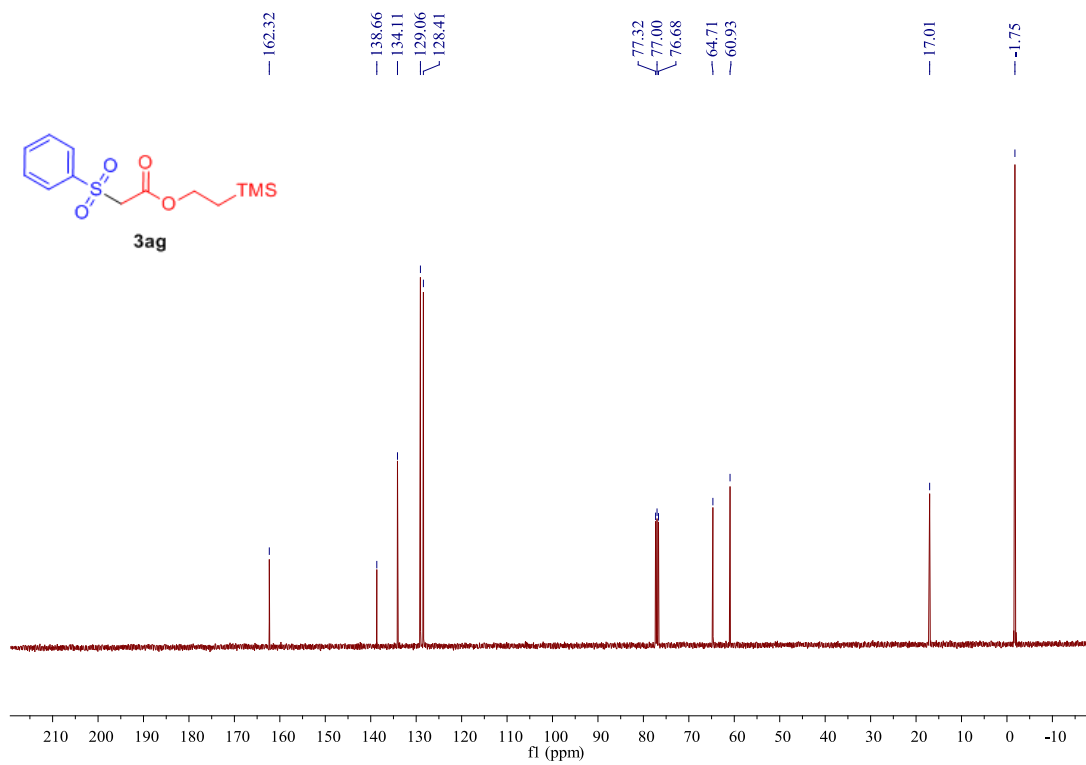

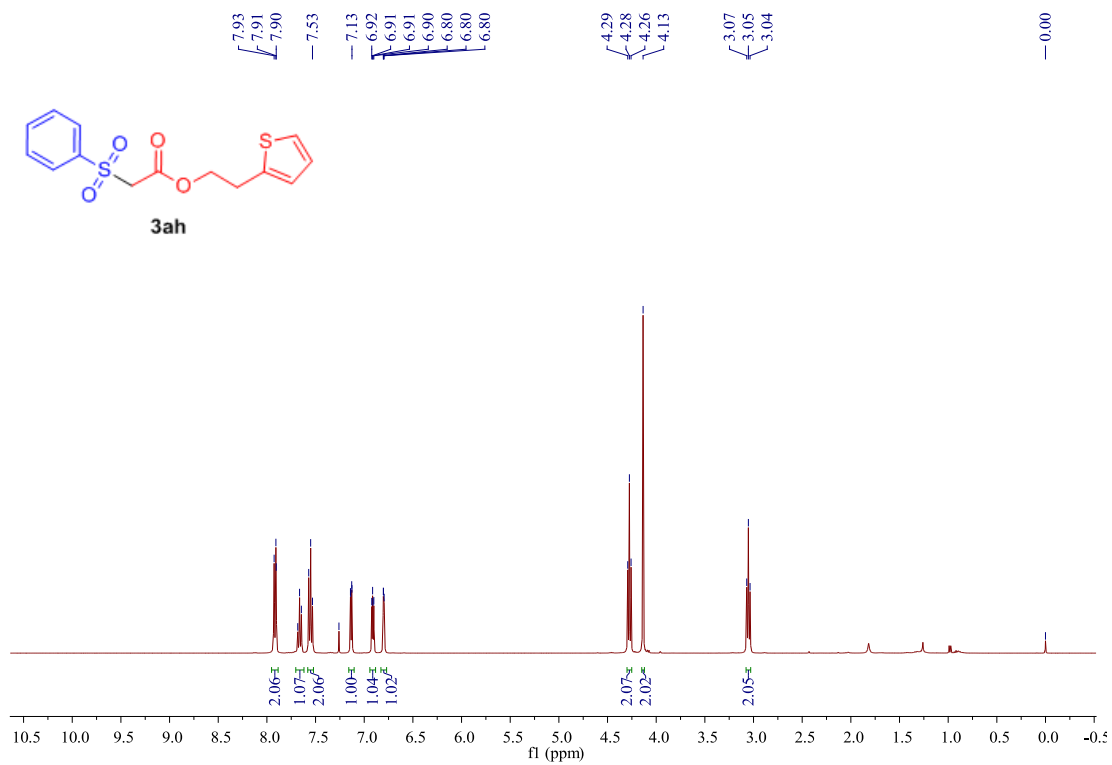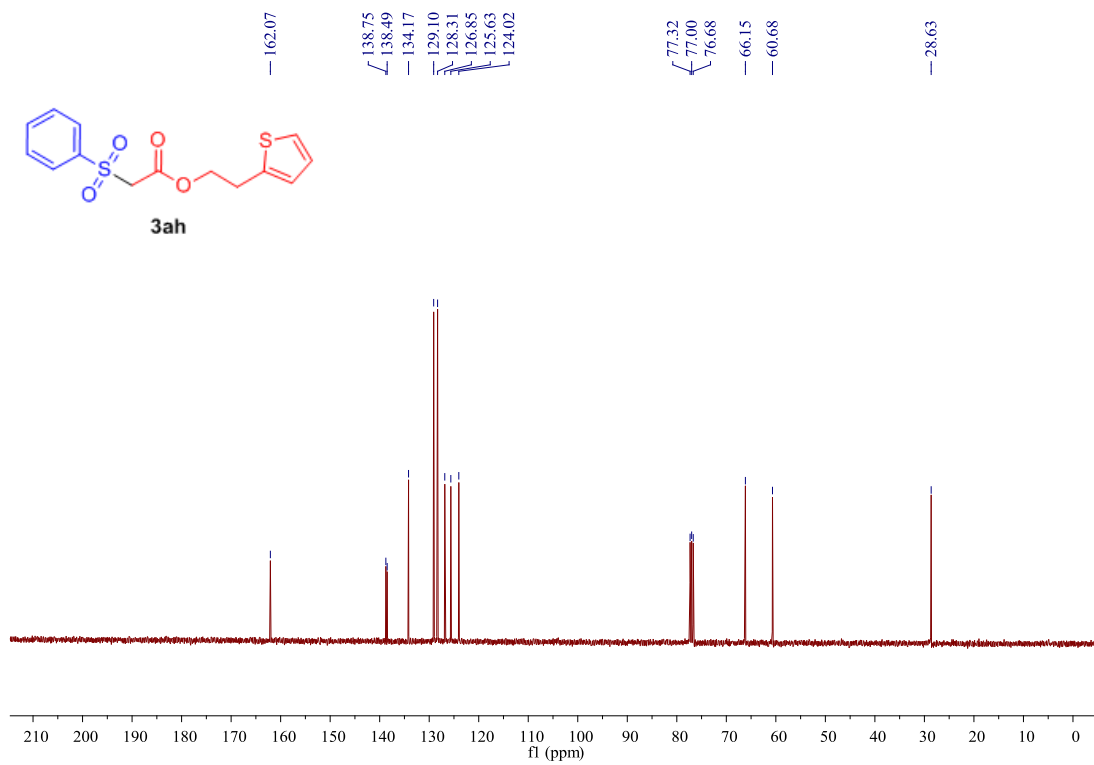

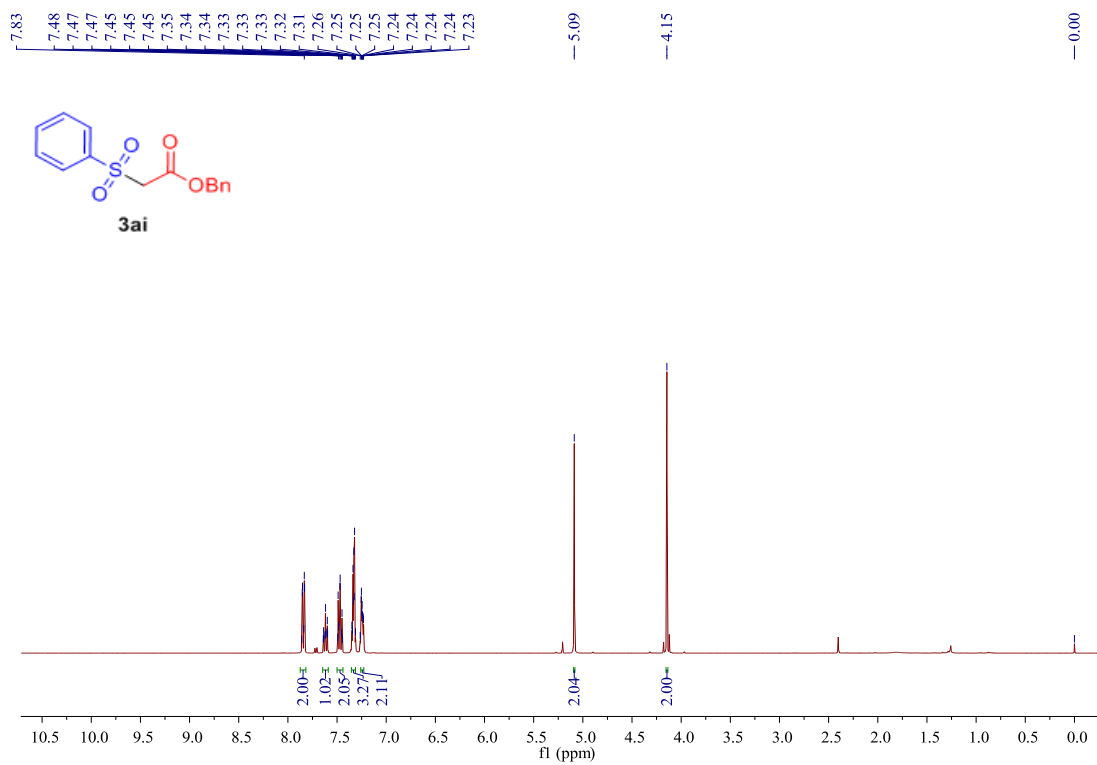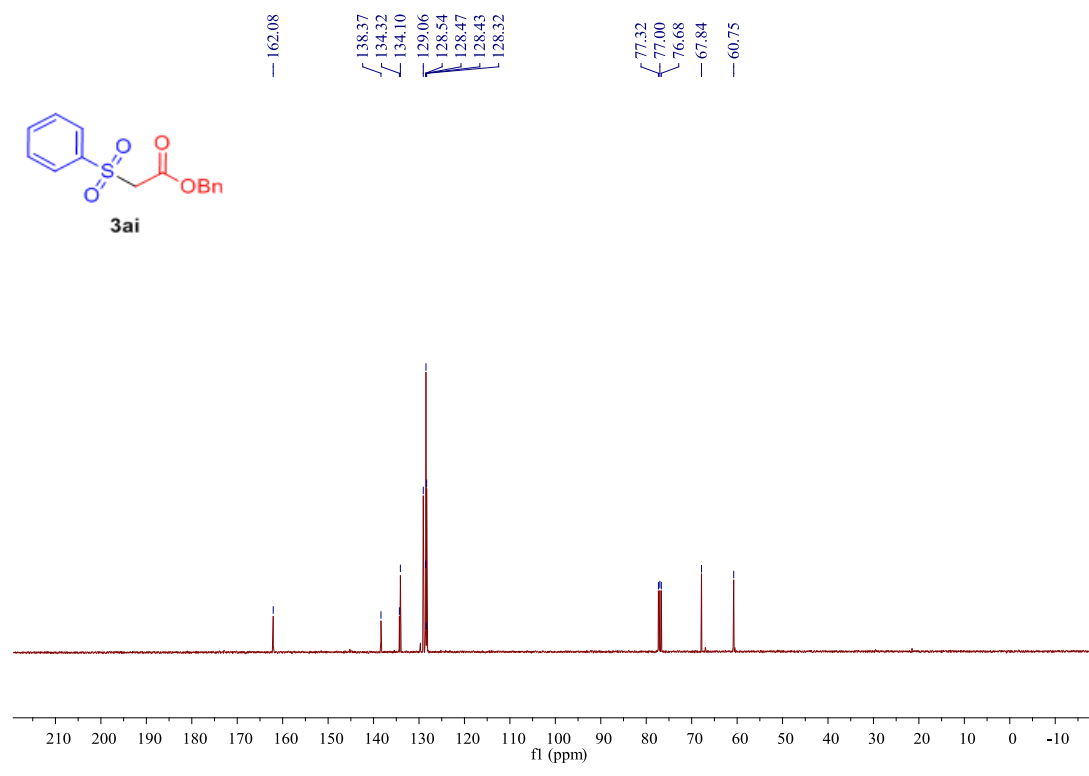



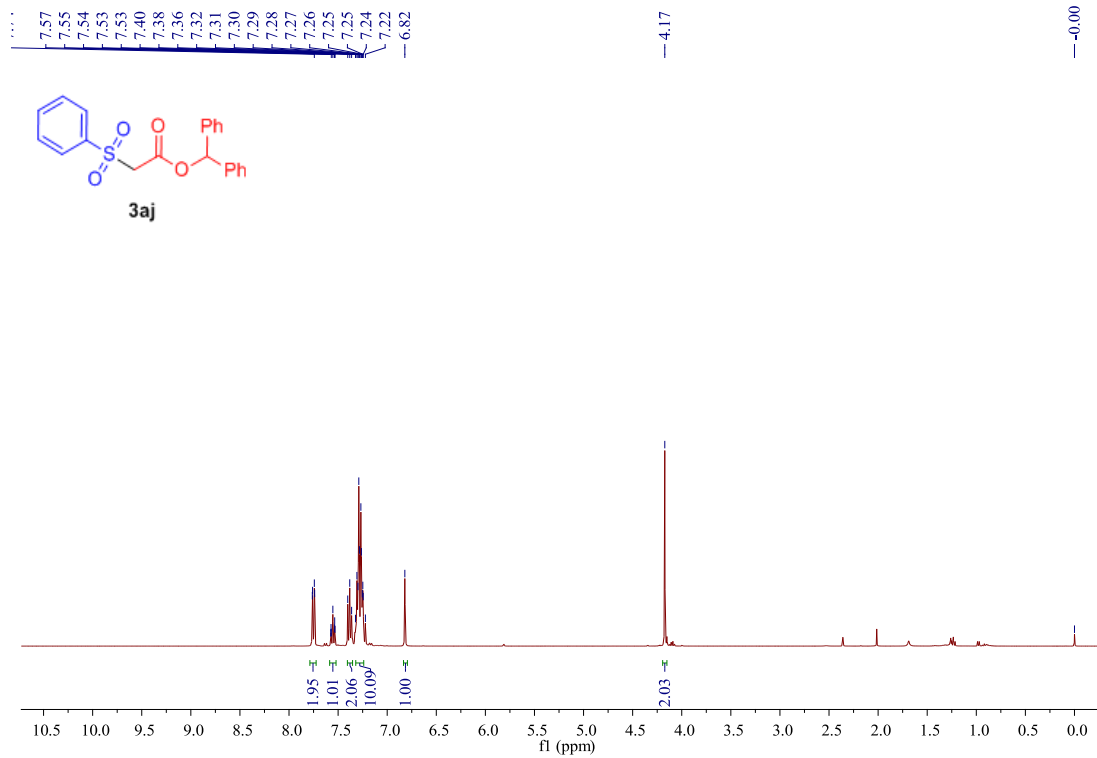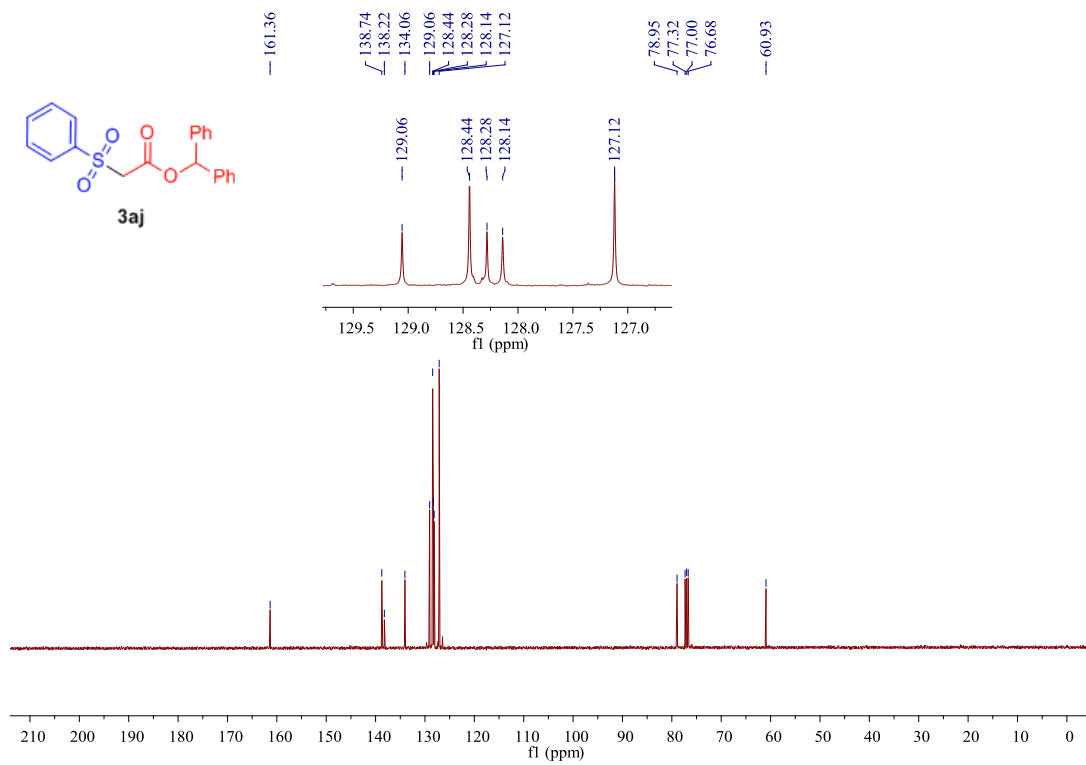

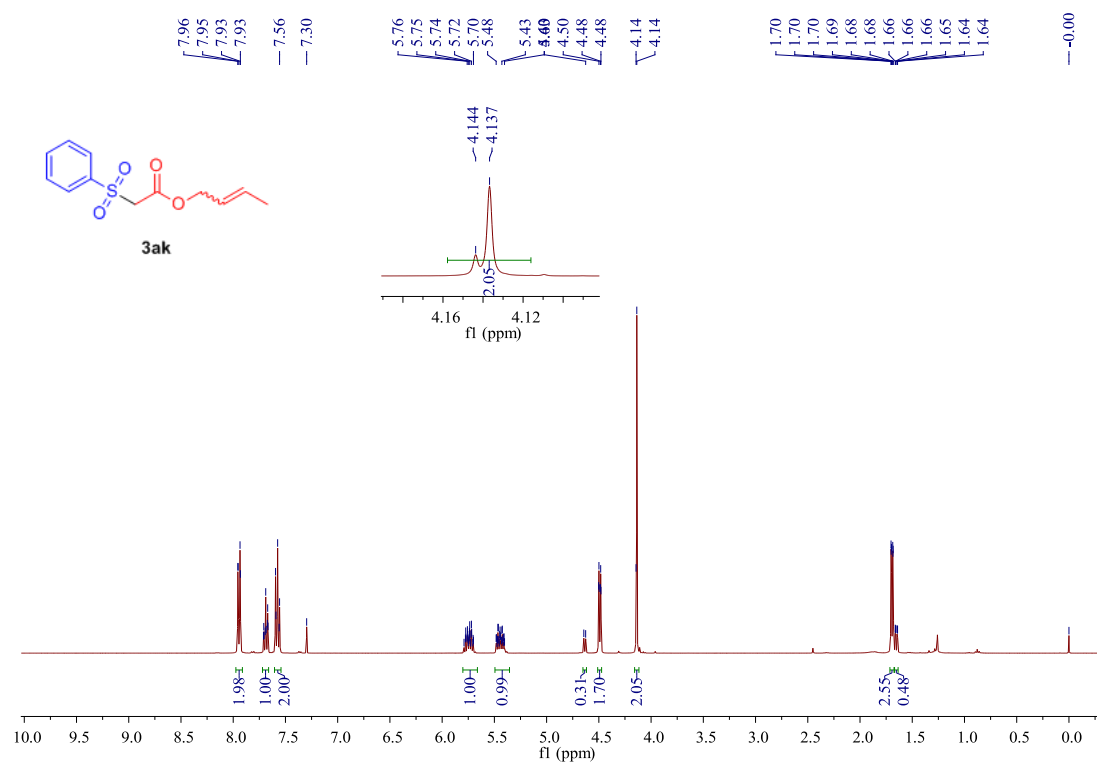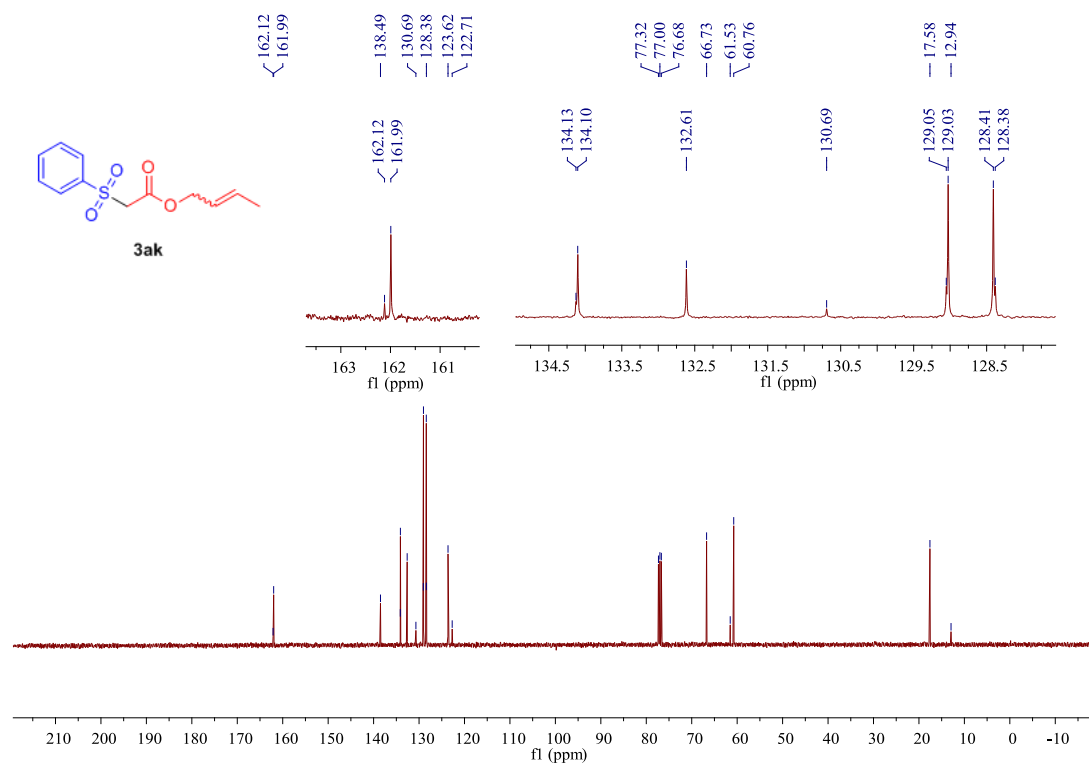

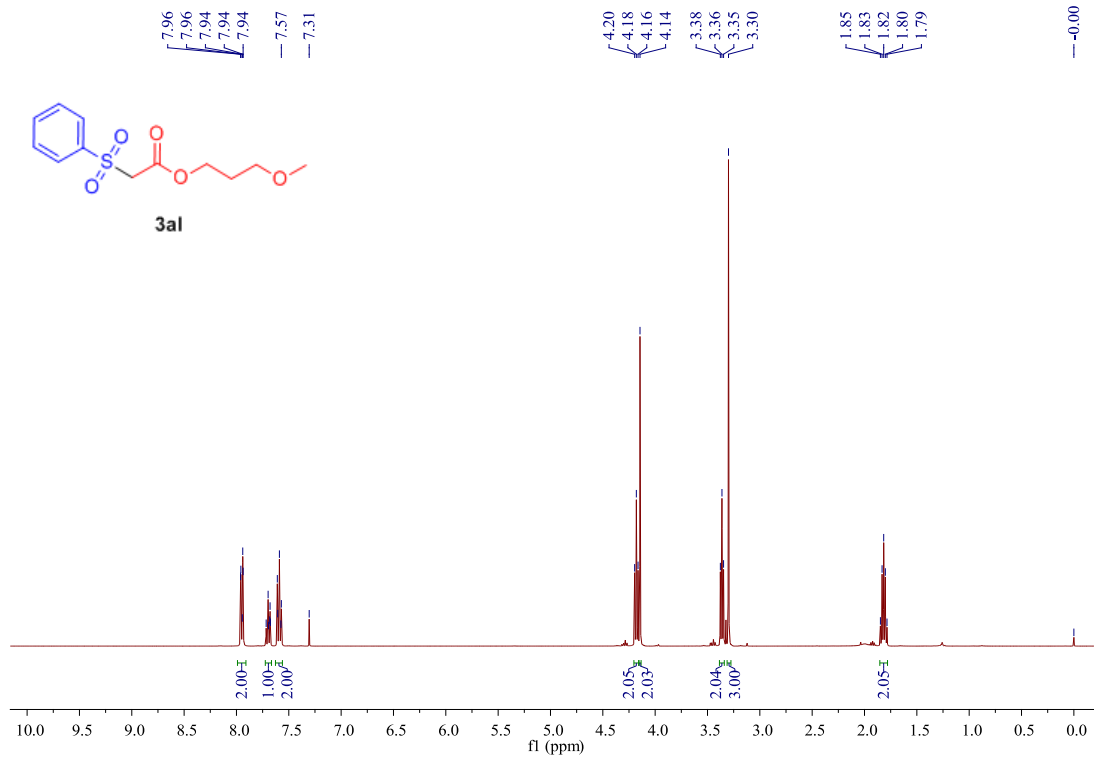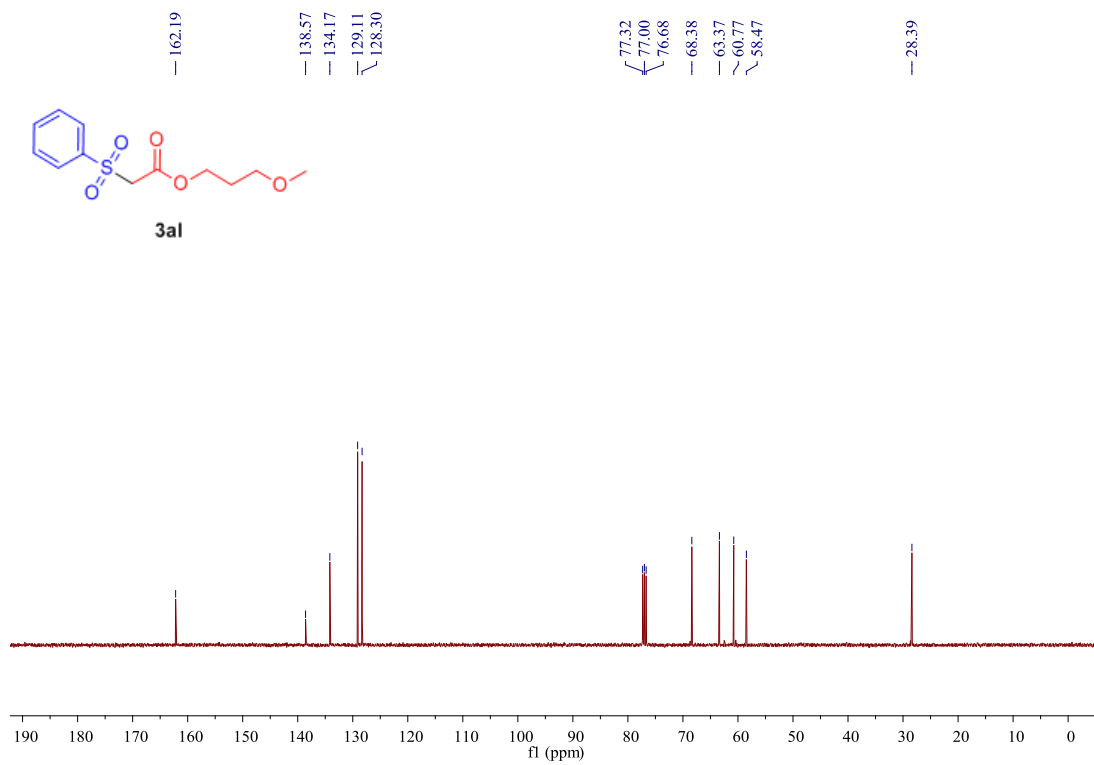

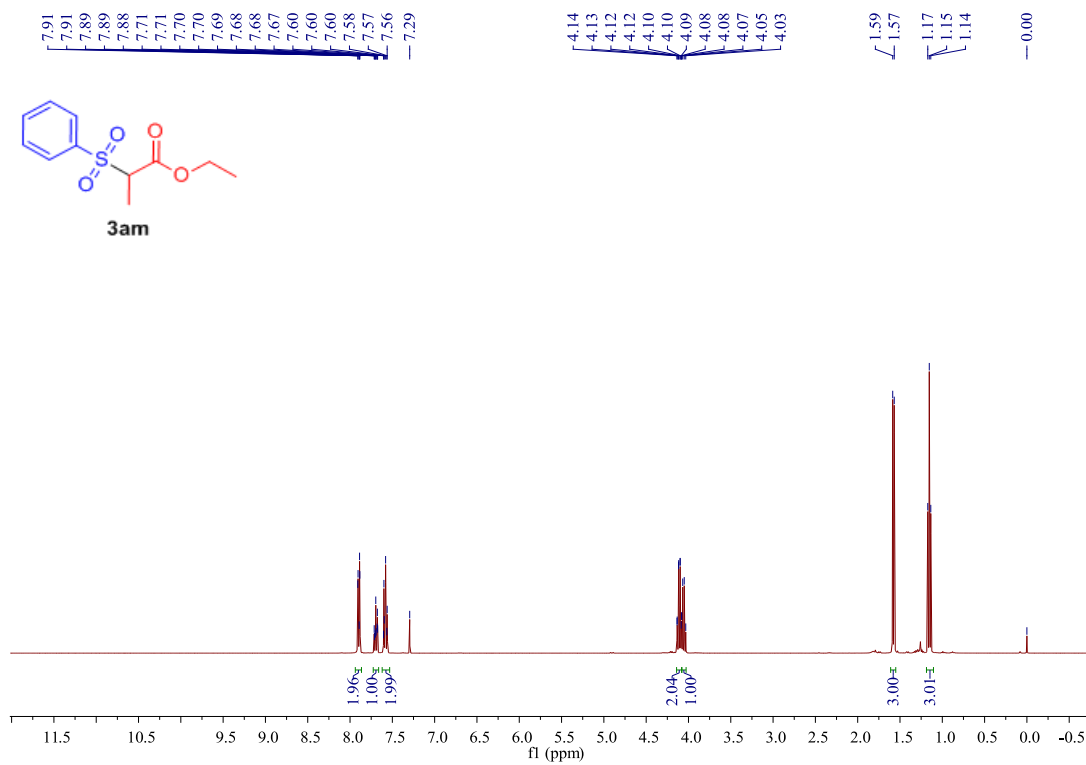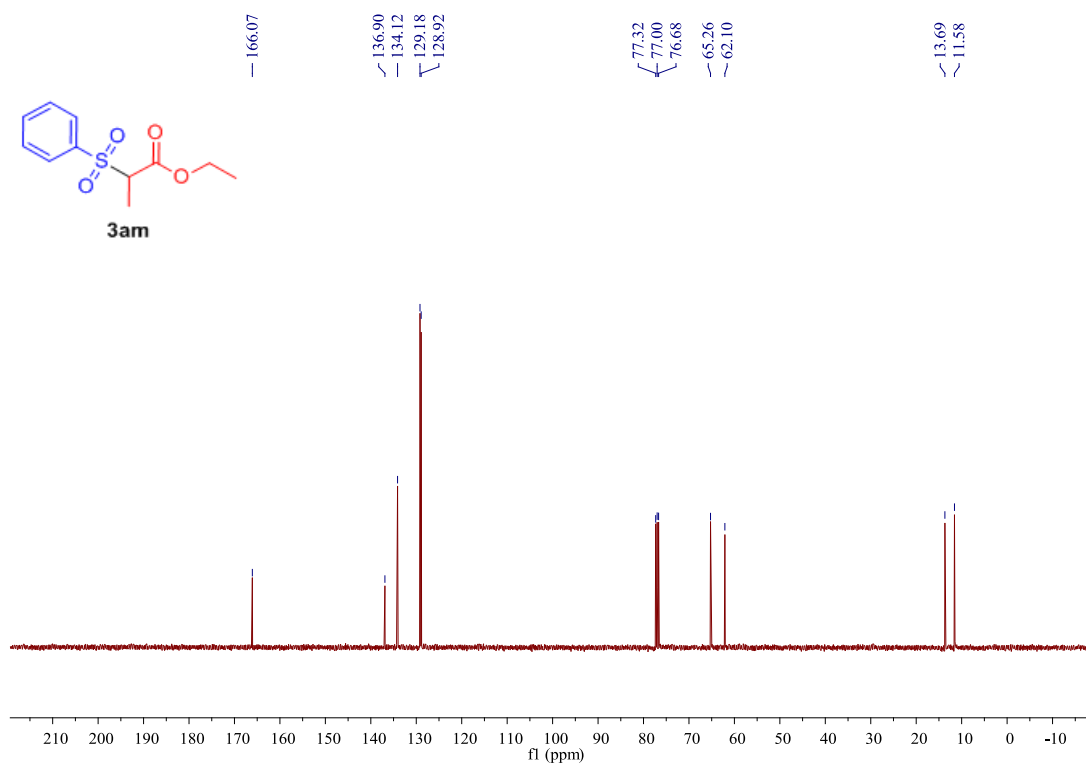

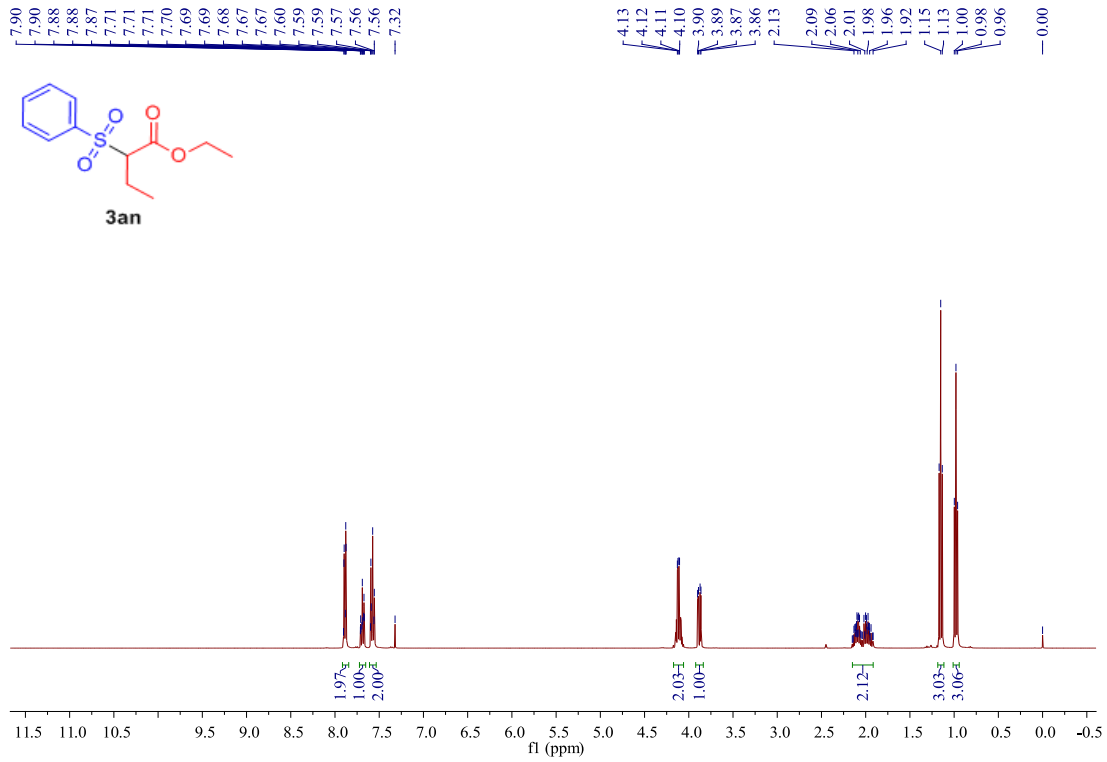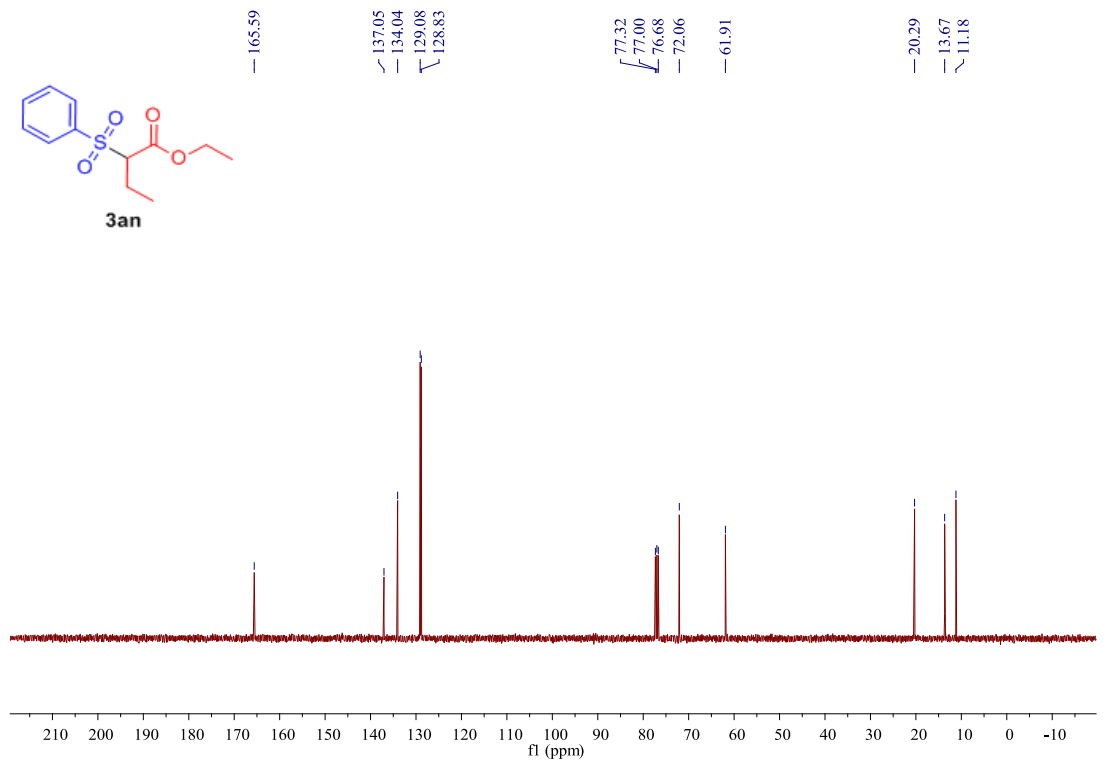

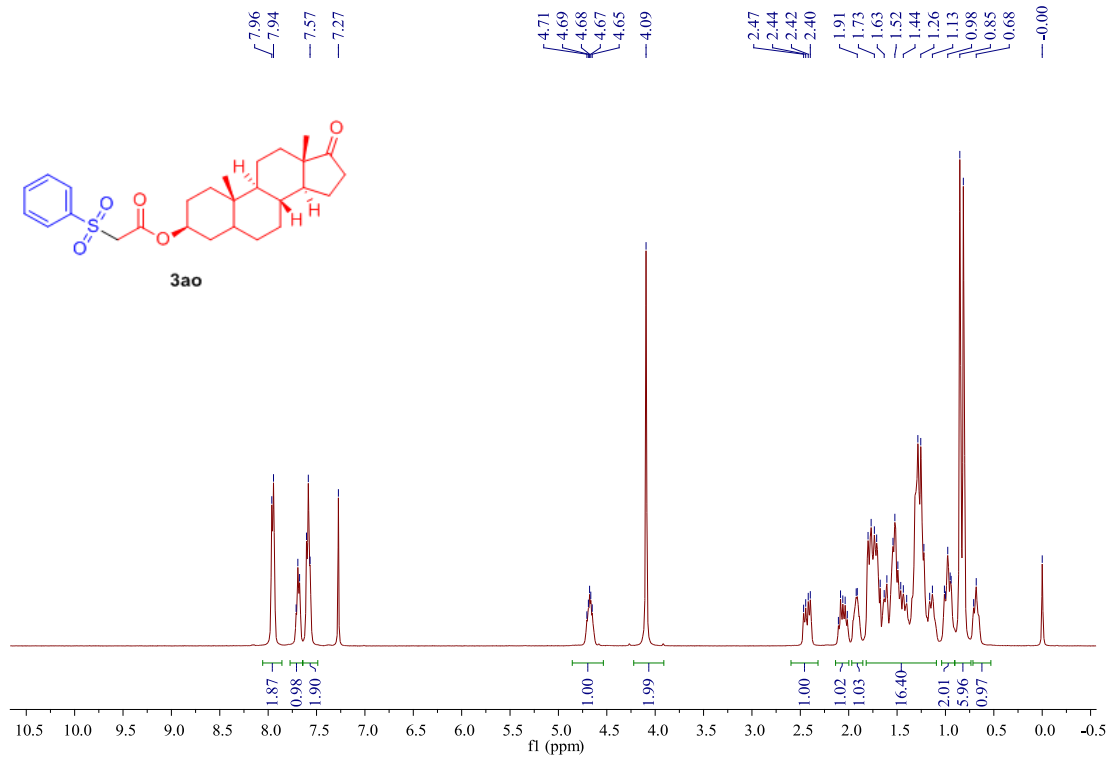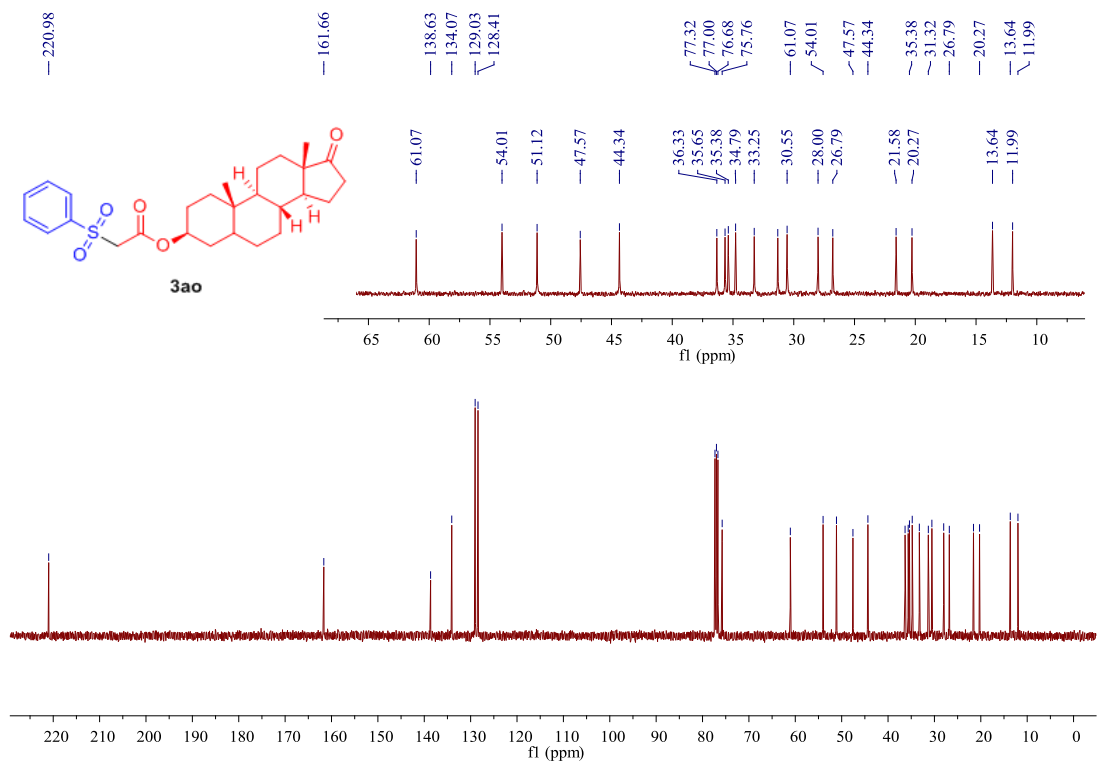

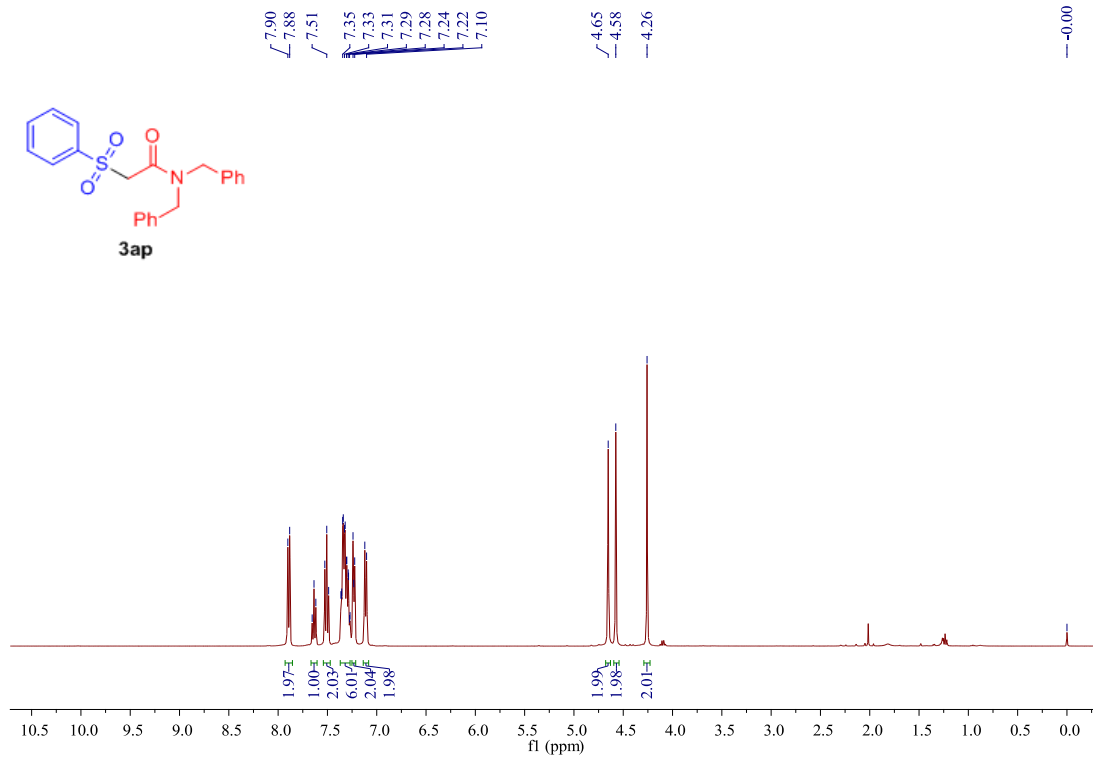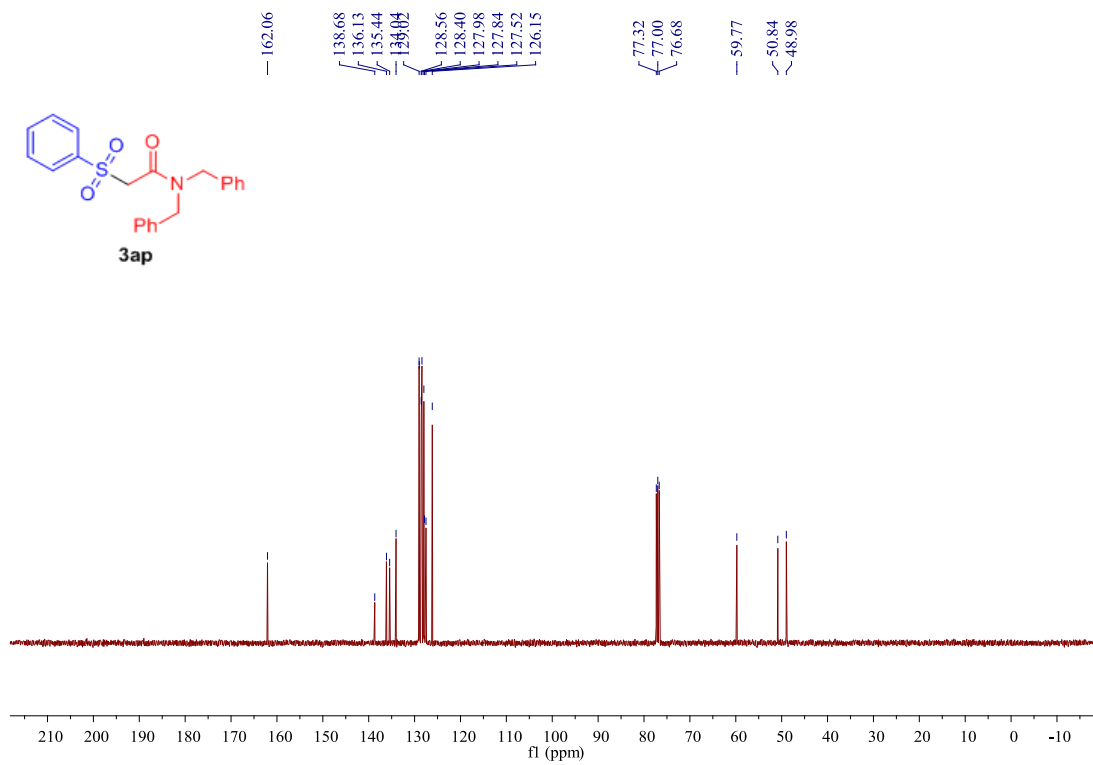

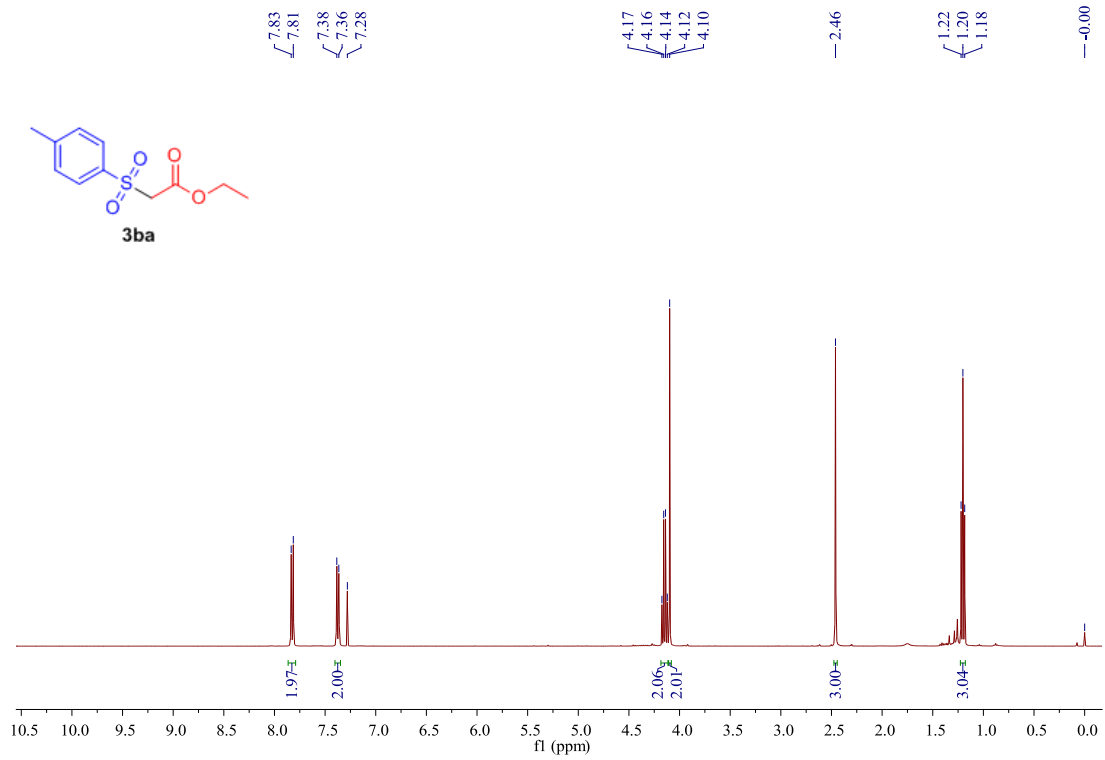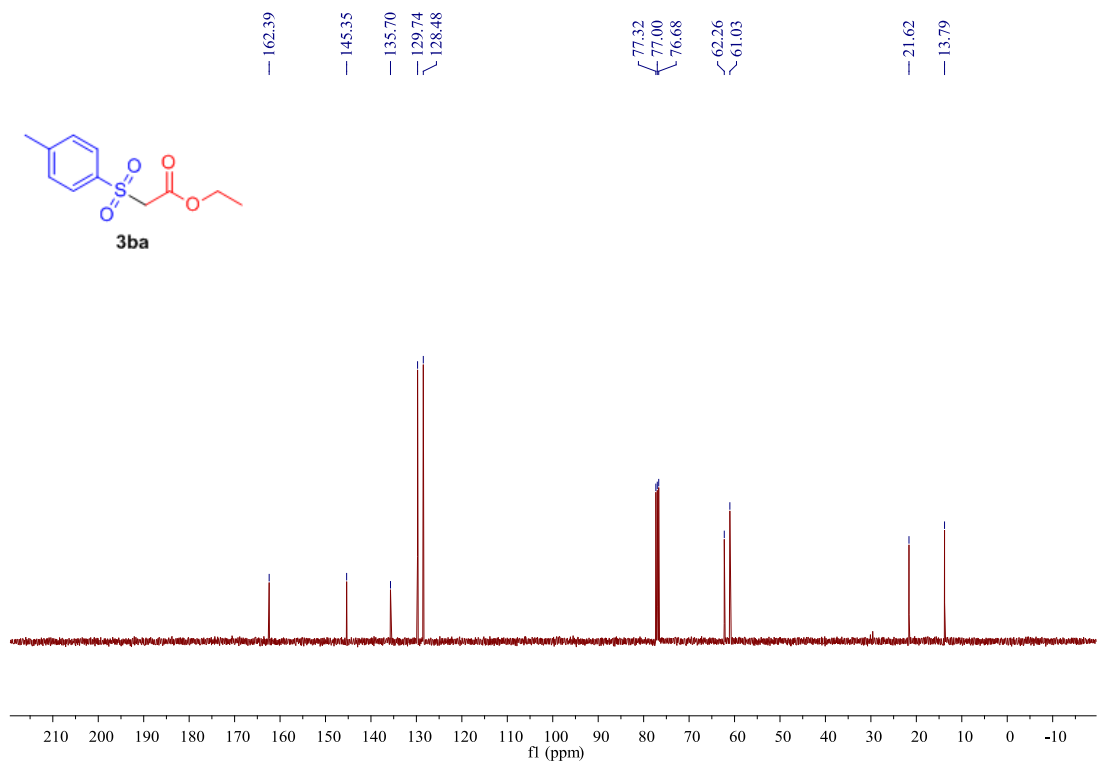



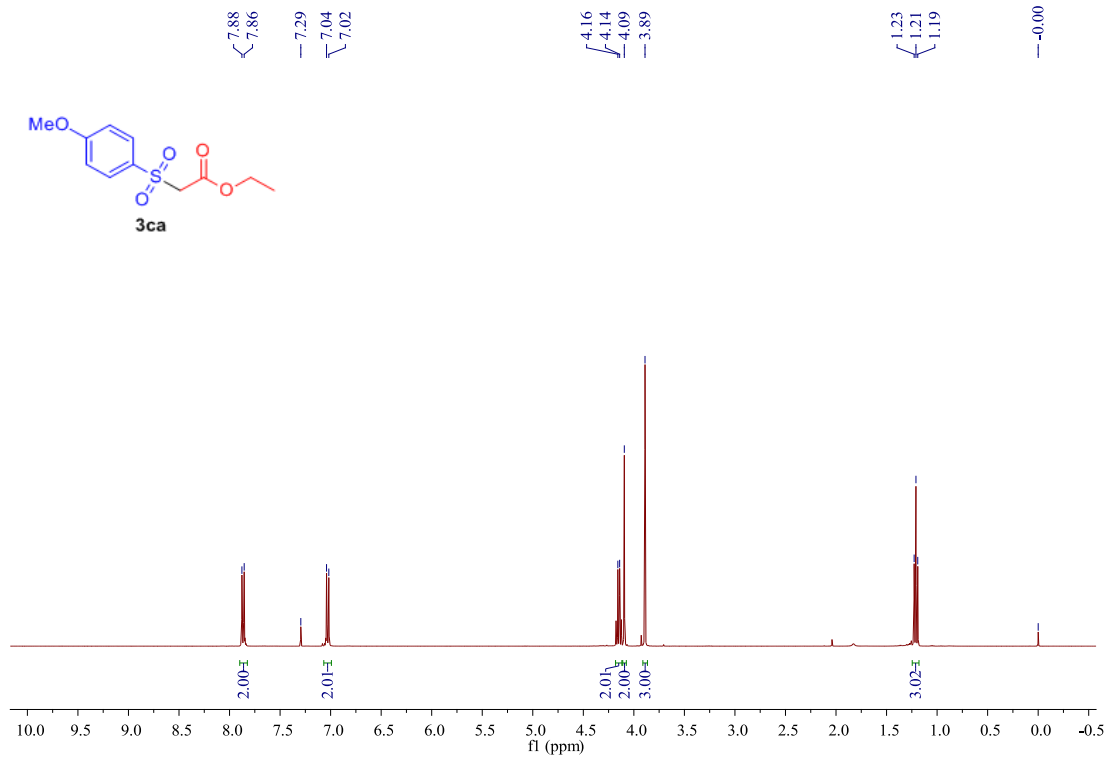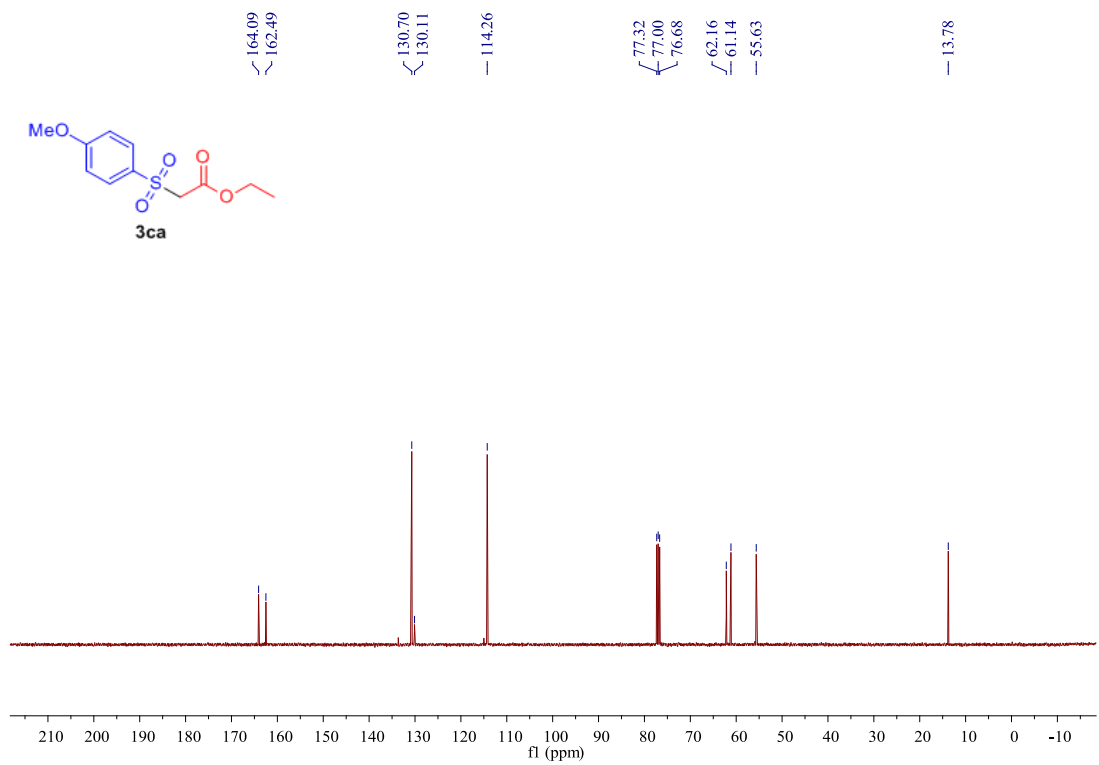

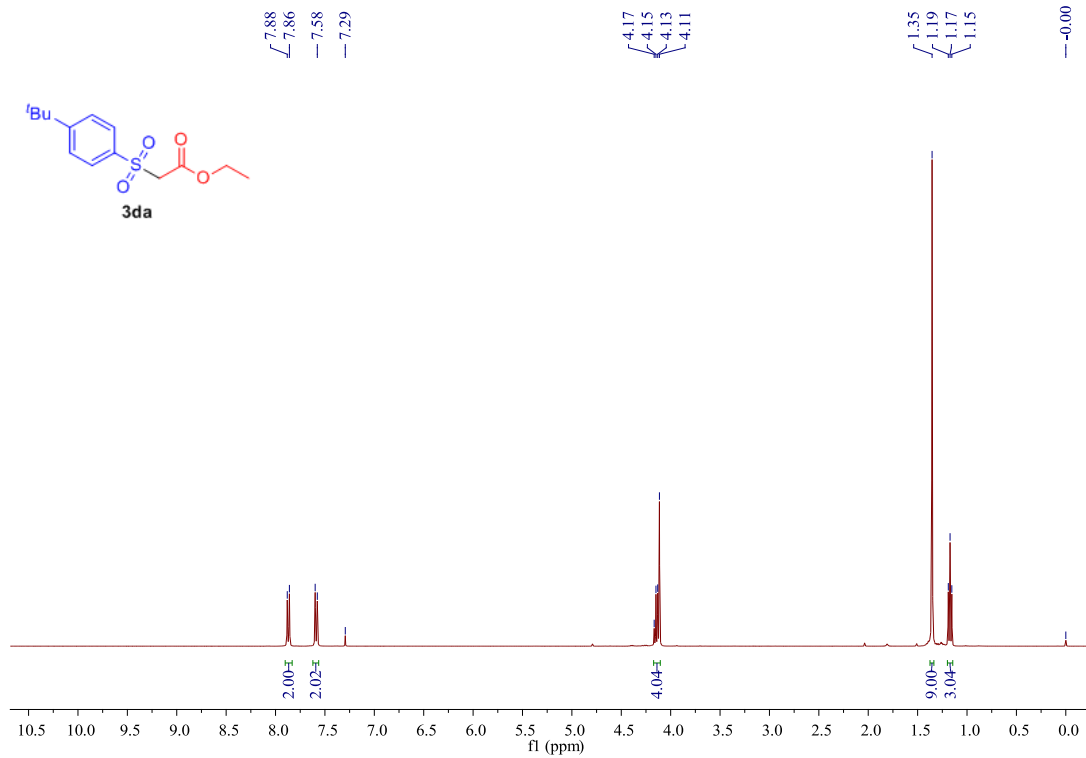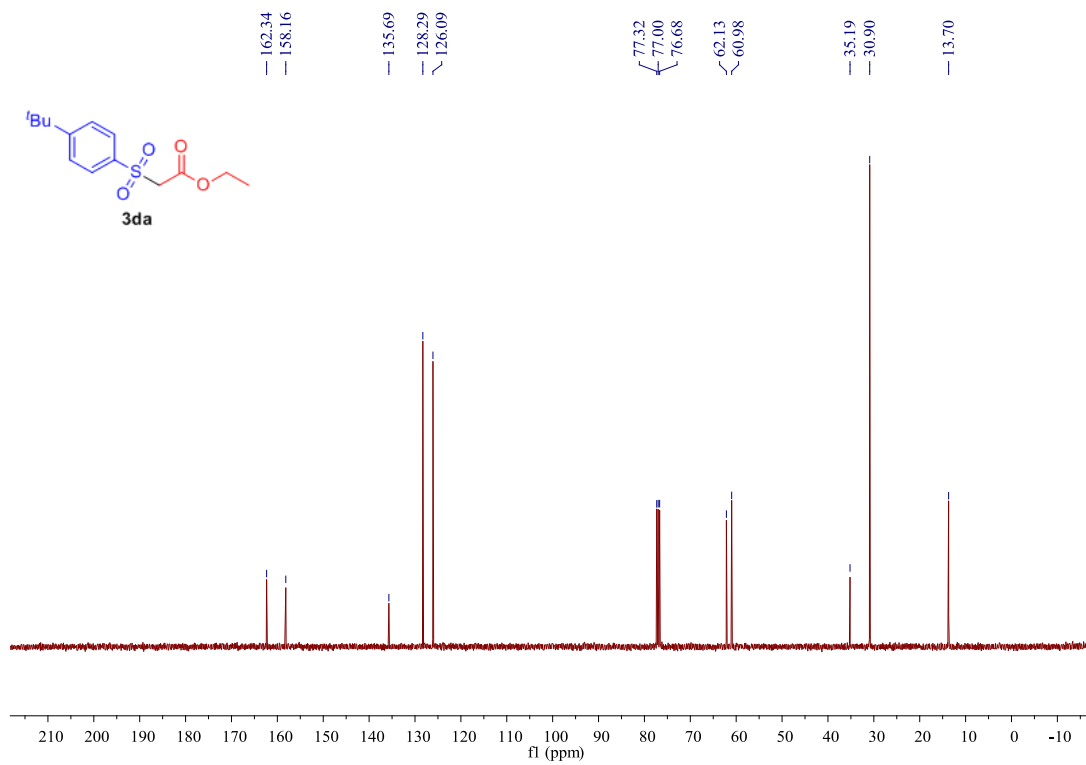

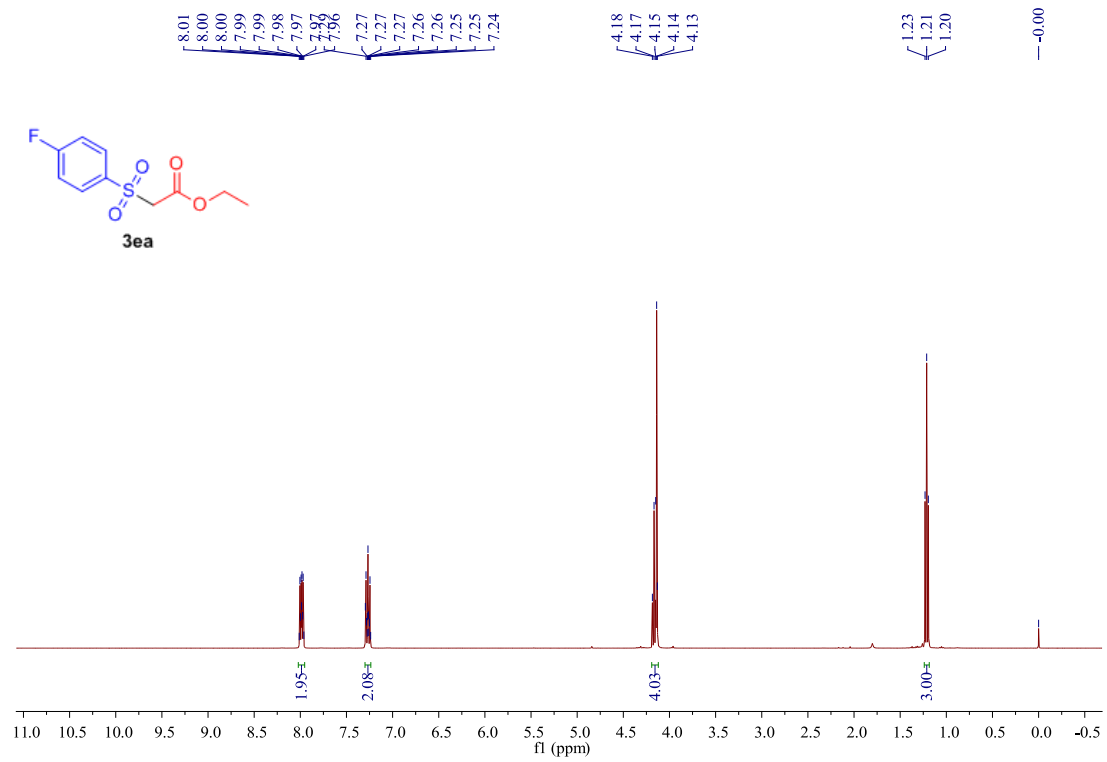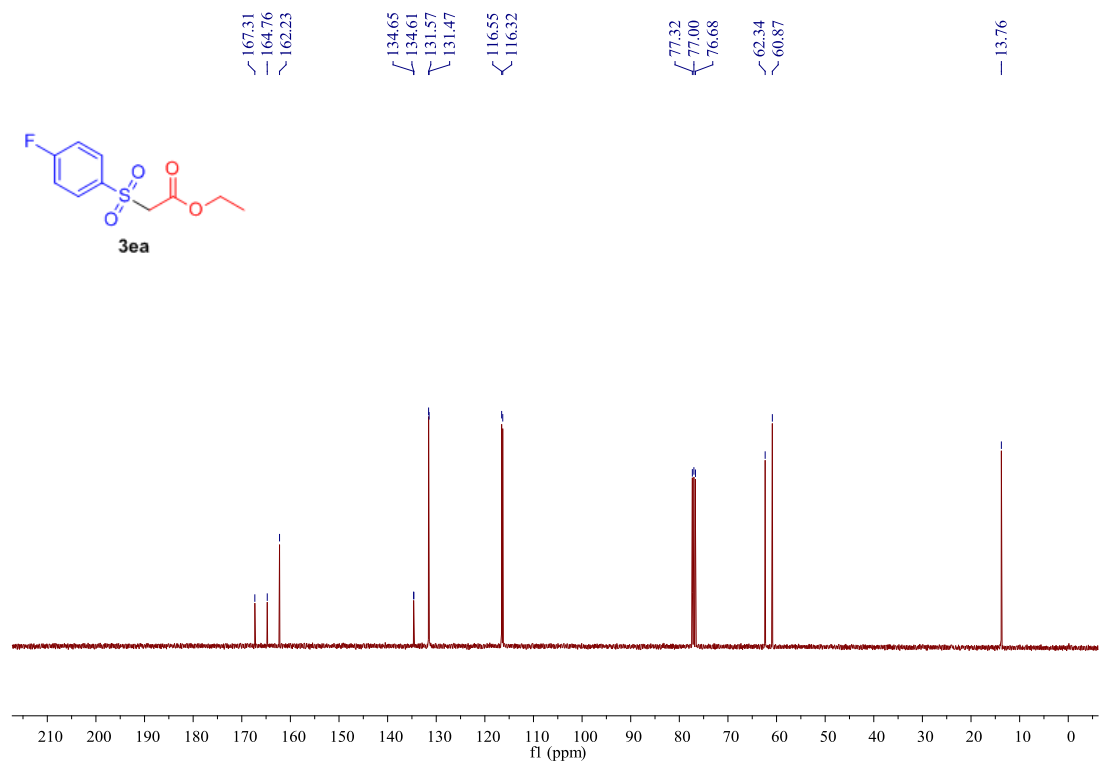

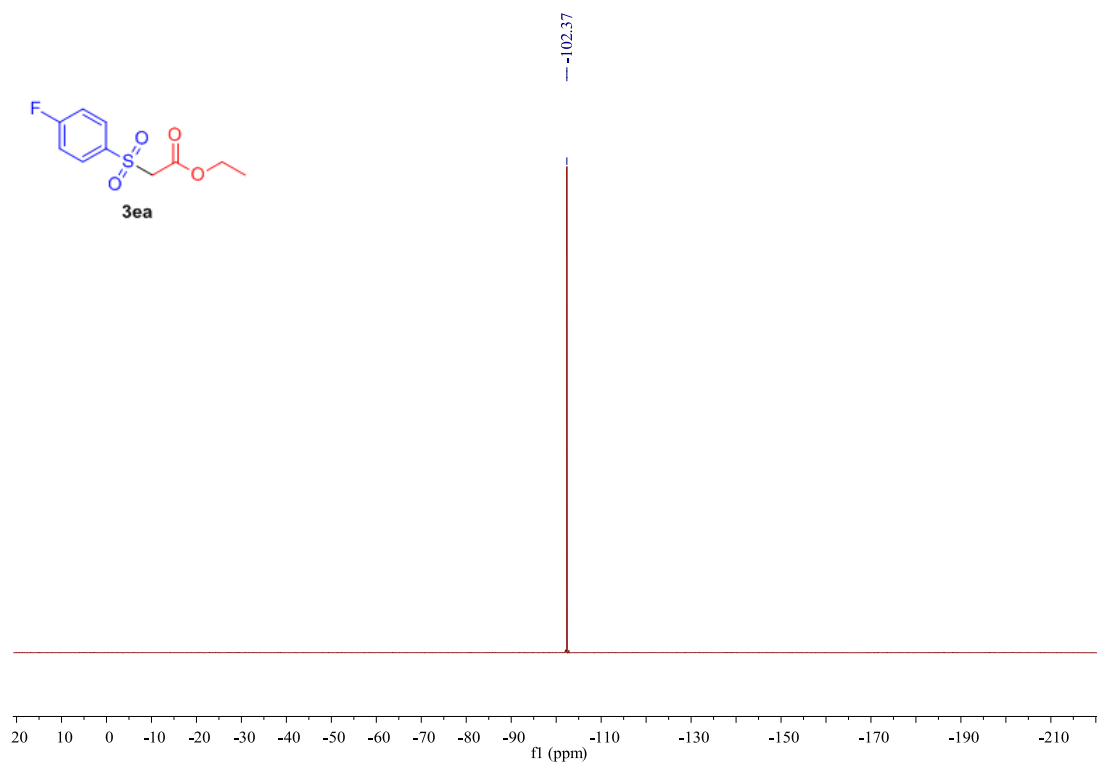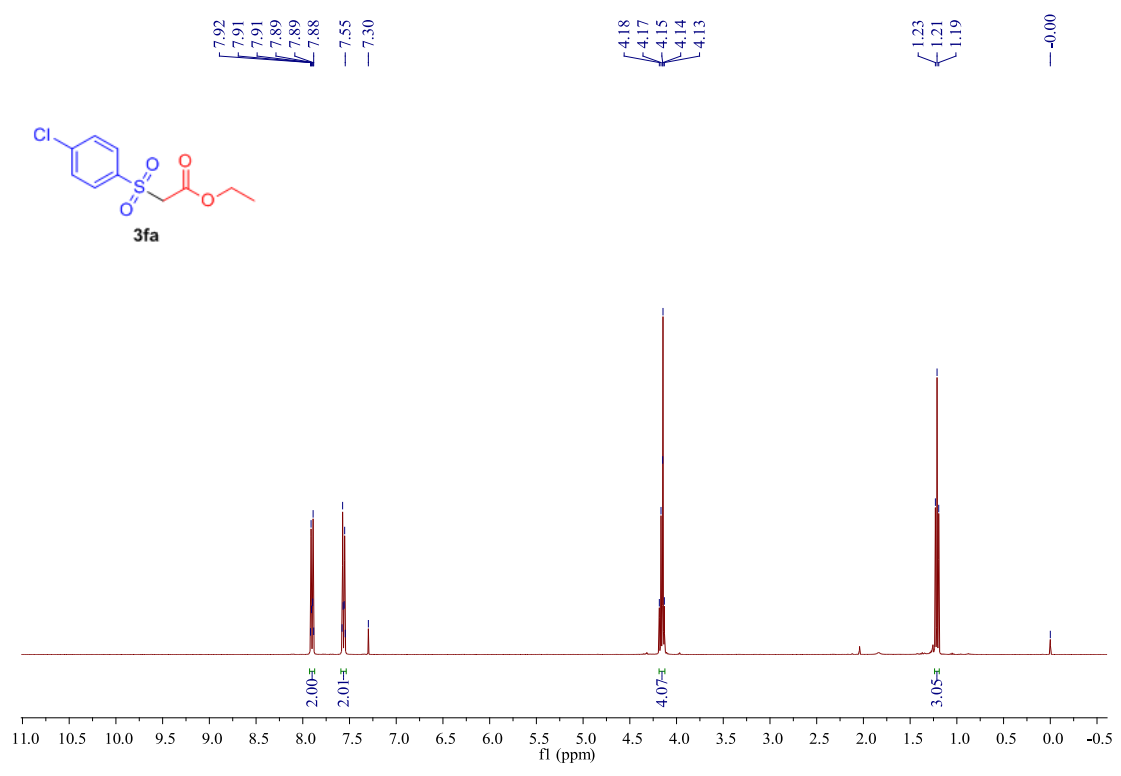

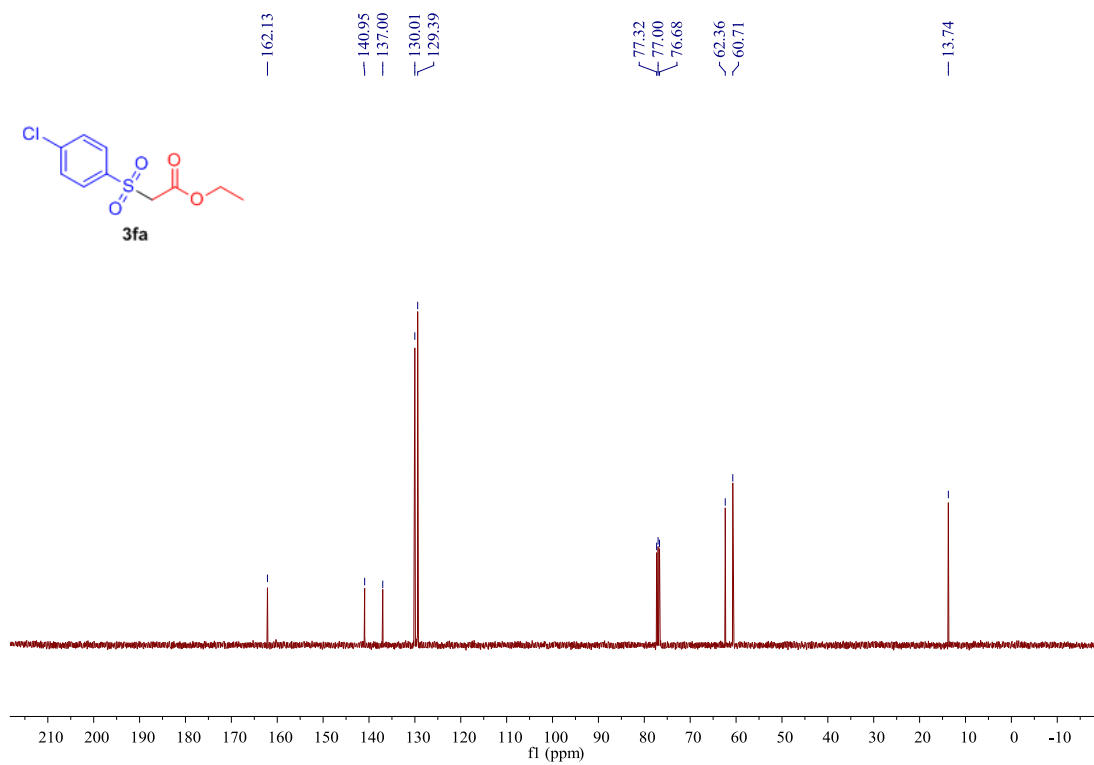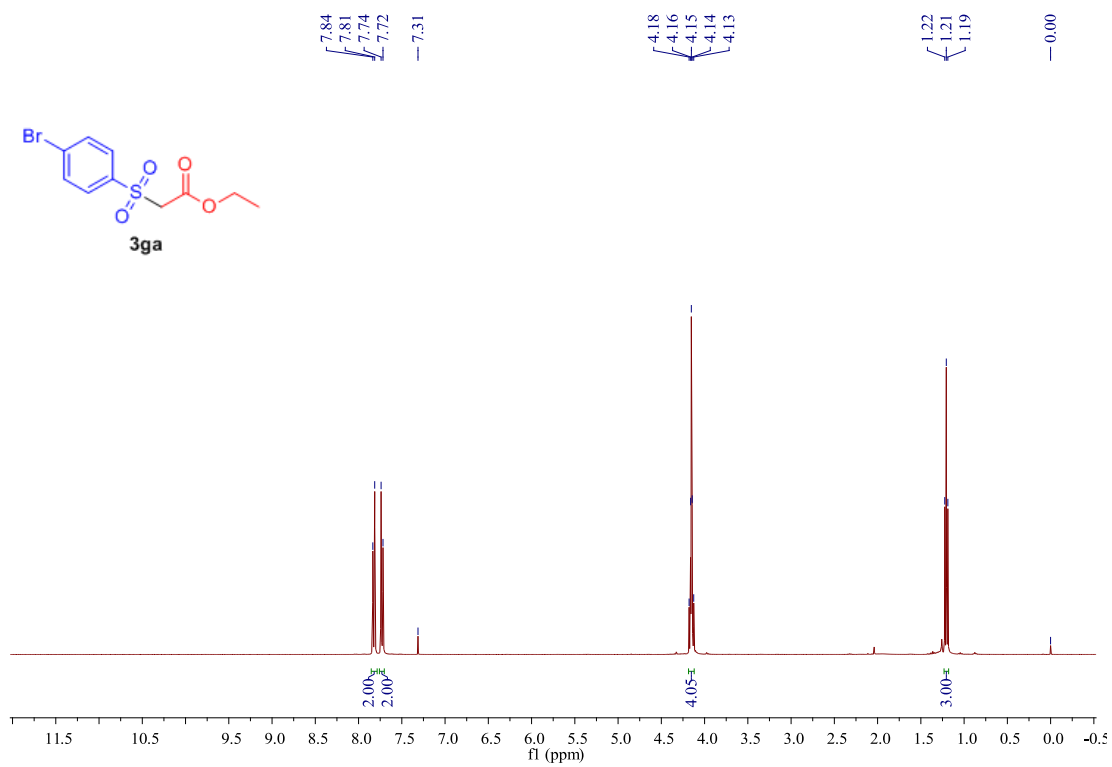

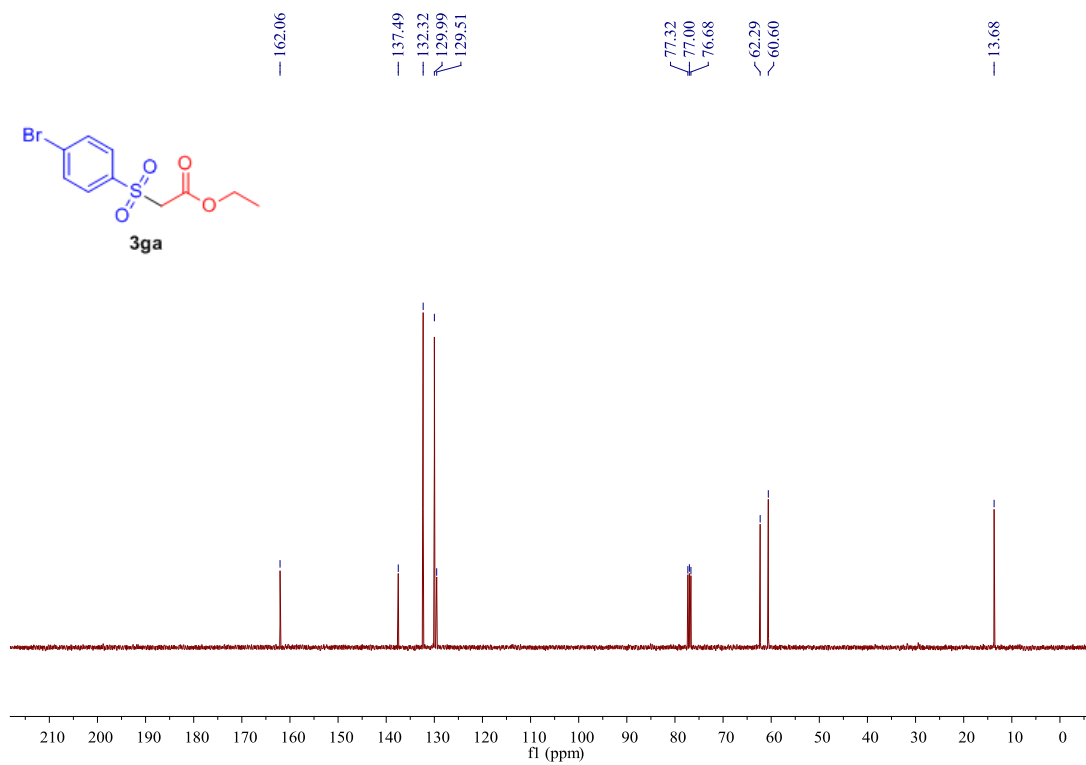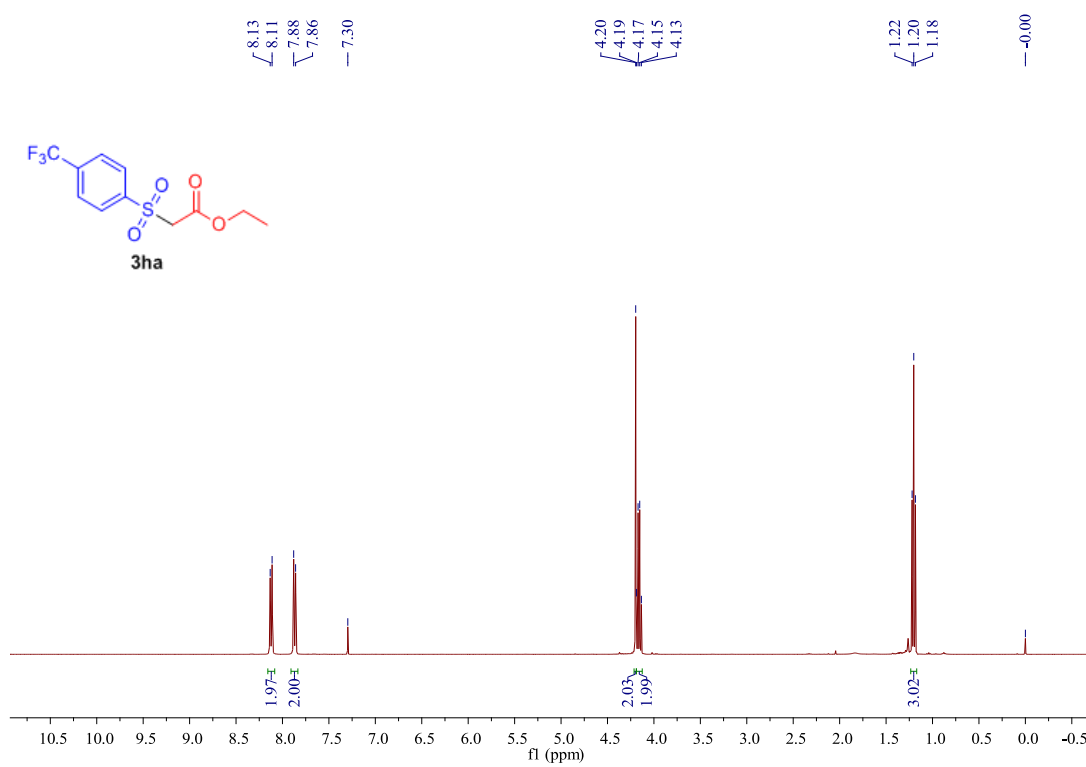

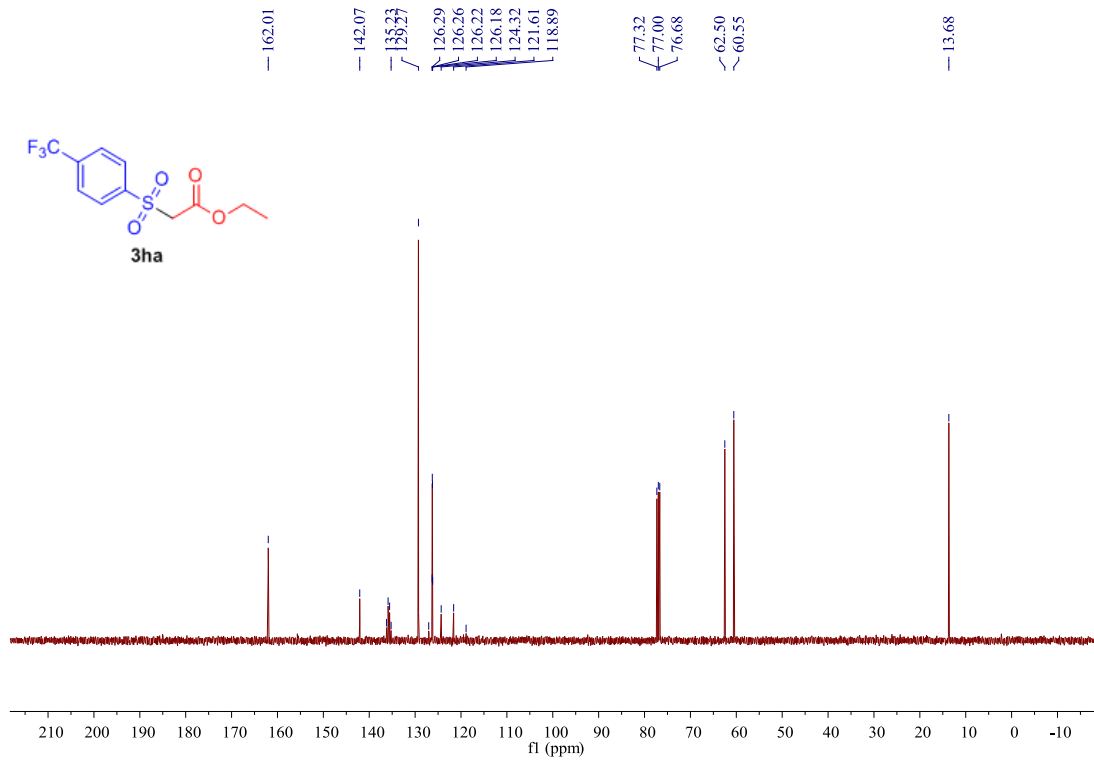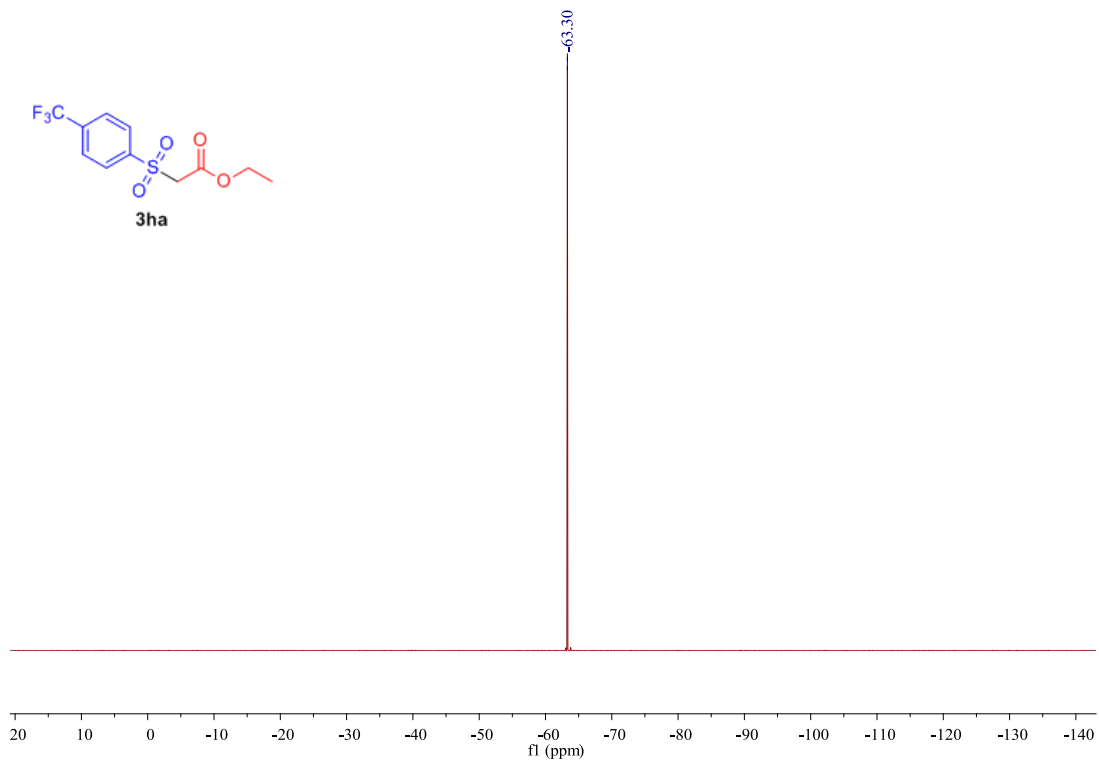

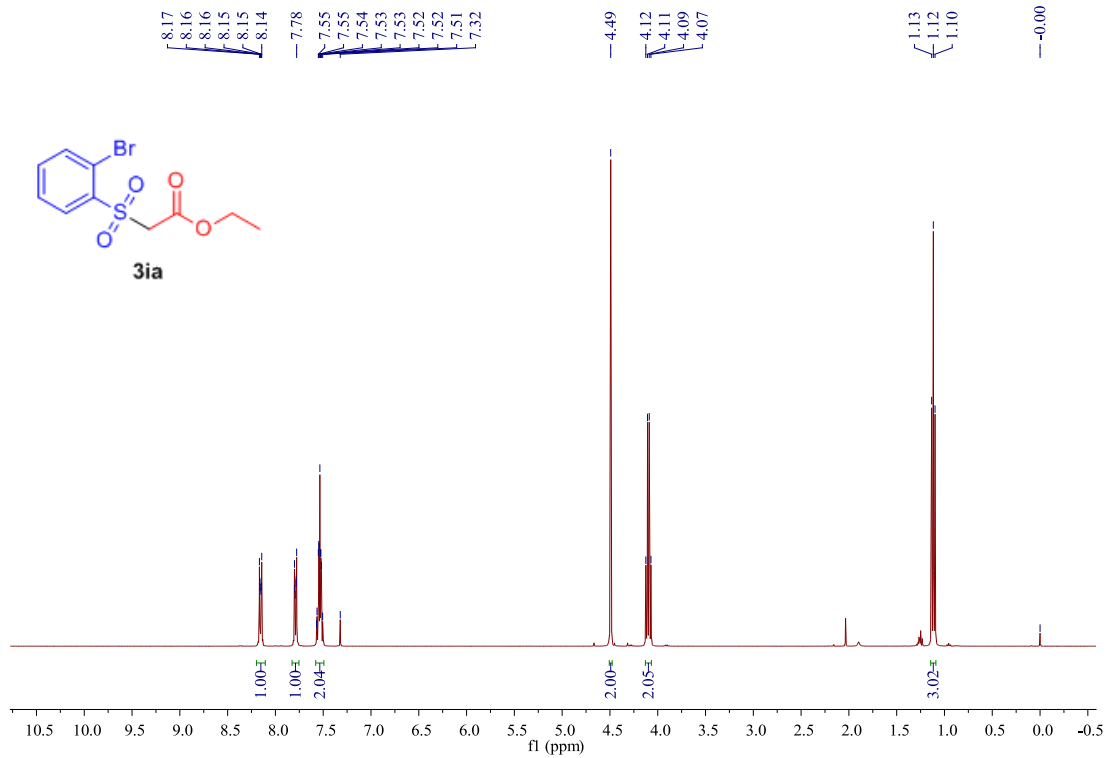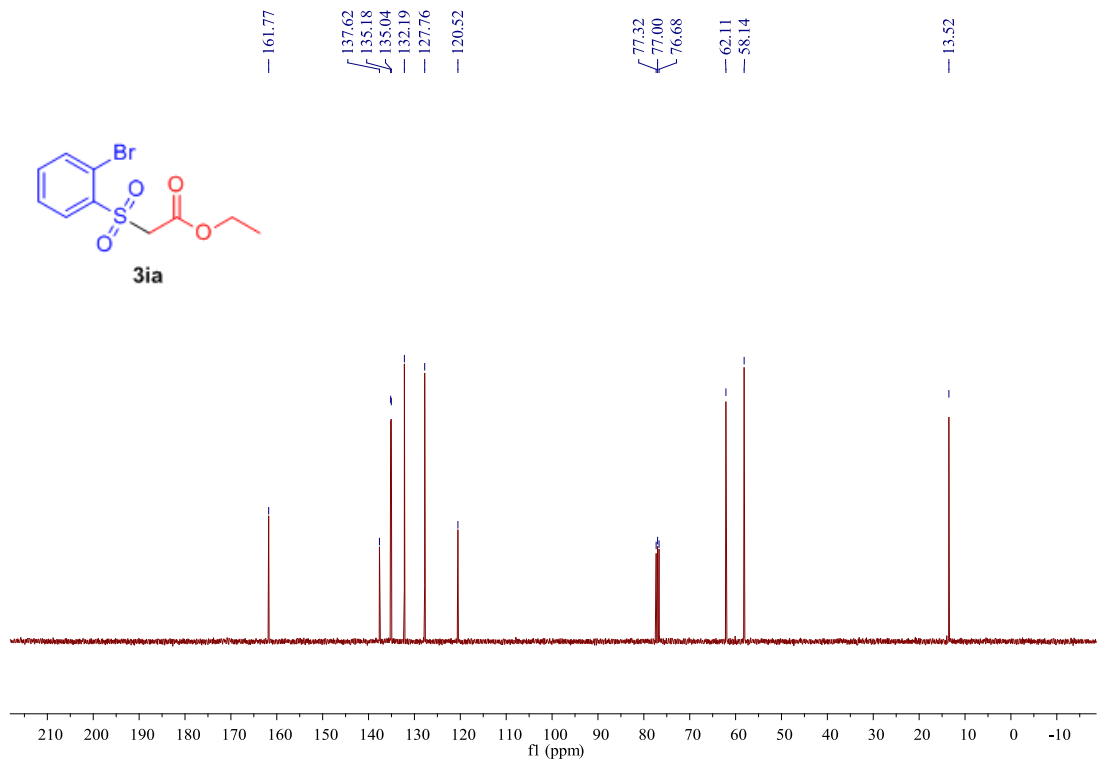



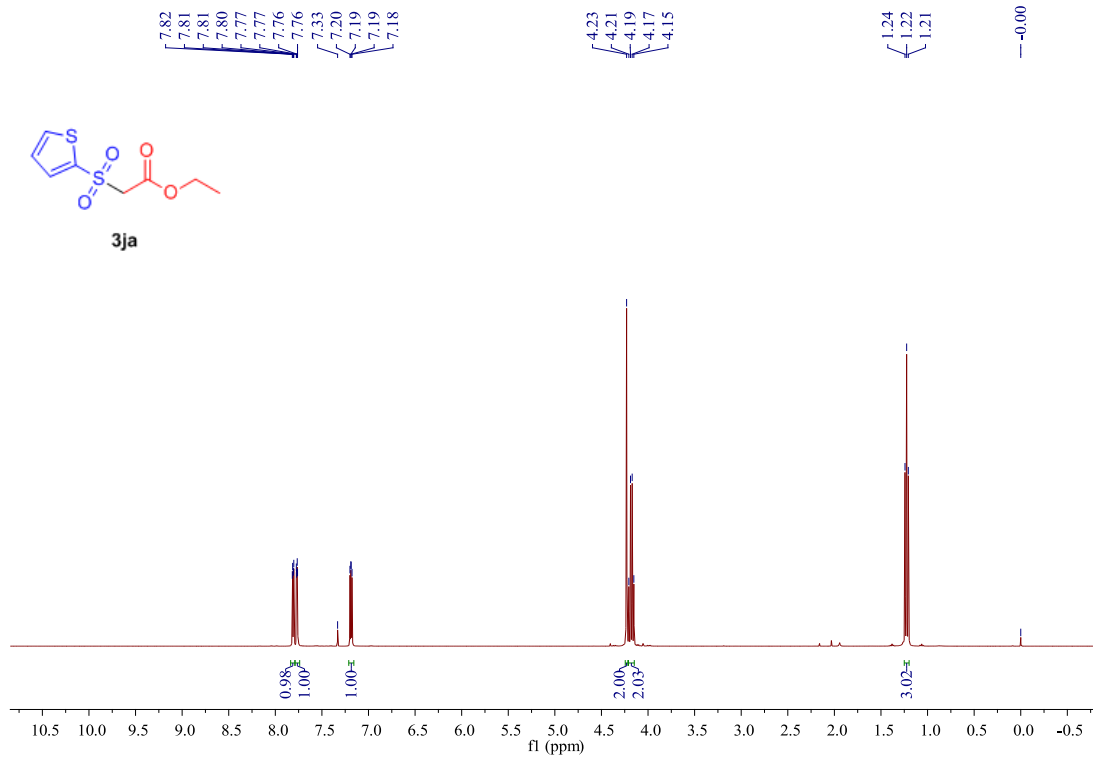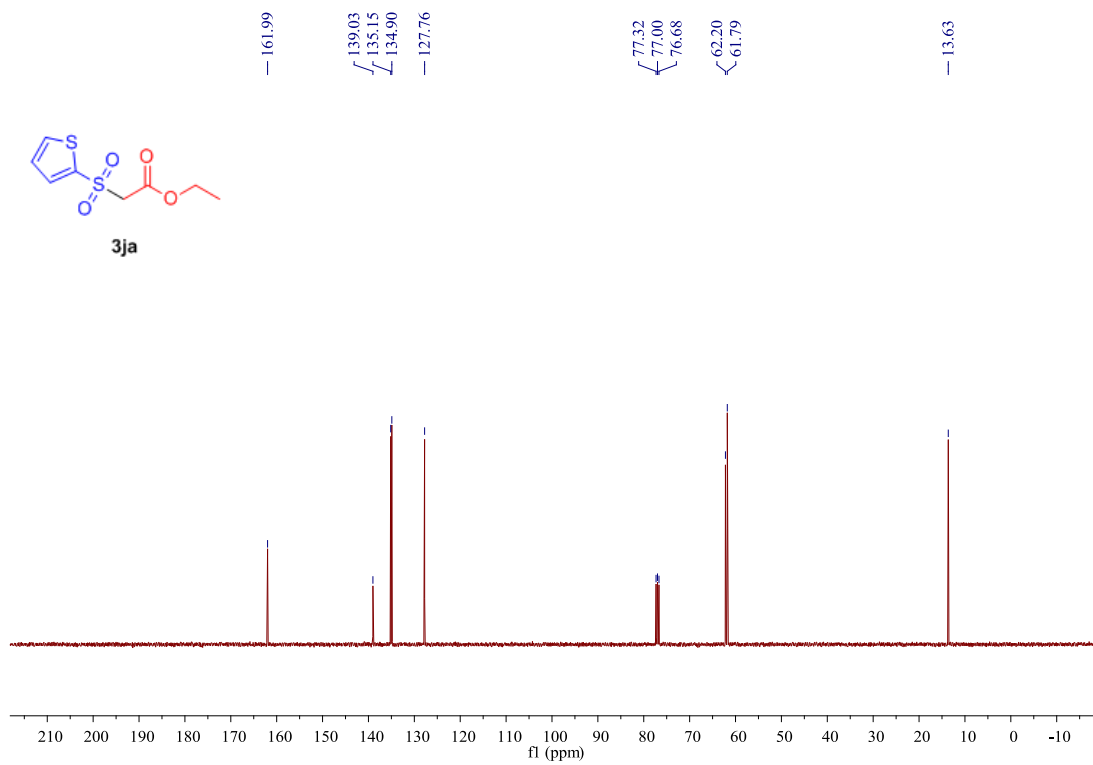

Supplement: d0ob00091d1.pdf [file d0ob00091d1.pdf]
